# Transcriptional profiling of non-injured nociceptors after spinal cord injury reveals diverse molecular changes

Jessica R. Yasko<sup>1</sup>, Isaac L. Moss<sup>2</sup>, Richard E. Mains<sup>1,\*</sup>

<sup>1</sup> University of Connecticut Health Center, Department of Neuroscience, Farmington CT 06030

<sup>2</sup> University of Connecticut Health Center, Department of Orthopedic Surgery and the Comprehensive Spine Center, Farmington CT 06030

## \* Correspondence:

Richard E. Mains

mains@uchc.edu 860-679-8894

**Running title:** Transcriptional profiling of non-injured nociceptors

**Keywords:** DRG, pain, inflammation, von Frey, hypersensitivity, FACS

## Abstract

Traumatic spinal cord injury (SCI) has devastating implications for patients, including a high predisposition for developing chronic pain distal to the site of injury. Chronic pain develops weeks to months after injury, consequently patients are treated after irreparable changes have occurred. Nociceptors are central to chronic pain; however, the diversity of this cellular population presents challenges to understanding mechanisms and attributing pain modalities to specific cell types. To begin to address how peripheral sensory neurons distal to the site of injury may contribute to the below-level pain reported by SCI patients, we examined SCI-induced changes in gene expression in lumbar dorsal root ganglia (DRG) below the site of injury. SCI was performed at the T10 vertebral level, with injury produced by a vessel clip with a closing pressure of 15g for 1 minute. Alterations in gene expression produce long-term sensory changes, therefore we were interested in studying SCI-induced transcripts before the onset of chronic pain, which may trigger changes in downstream signaling pathways and ultimately facilitate the transmission of pain. To examine changes in the nociceptor subpopulation in DRG distal to the site of injury, we retrograde labeled sensory neurons projecting to the hairy hindpaw skin with fluorescent dye and collected the corresponding lumbar (L2-L6) DRG 4 days post-injury. Following dissociation, labeled neurons were purified by fluorescence-activated cell sorting. RNA was extracted from sorted sensory neurons of naïve, sham, or SCI mice and sequenced. Transcript abundances validated that the desired population of nociceptors were isolated. Cross-comparisons to data sets from similar studies confirmed we were able to isolate our cells of interest and identify a unique pattern of gene expression within a subpopulation of neurons projecting to the hairy hindpaw skin. Differential gene expression analysis showed high expression levels and significant transcript changes 4 days post-injury in SCI cell populations relevant to the onset of chronic pain. Regulatory interrelationships predicted by pathway analysis implicated changes within the synaptogenesis signaling pathway as well as networks related to inflammatory signaling mechanisms, suggesting a role for synaptic plasticity and a correlation with pro-inflammatory signaling in the transition from acute to chronic pain.

## 46 **Contribution to the field**

47 Traumatic spinal cord injury (SCI) has devastating implications for patients, including a high  
48 predisposition for developing chronic pain. Much of the pain seems to emanate from tissues further  
49 away from the brain than the site of injury. Chronic pain develops weeks to months after injury,  
50 which means that patients are frequently treated only after enduring pain has developed.  
51 Nociceptors are the specialized sensory neurons central to chronic pain. We were interested in  
52 studying SCI-induced gene transcript (RNA) changes before the onset of chronic pain, in the hope  
53 of identifying mechanisms which could become therapeutic targets. Nociceptors below the site of  
54 spinal injury were isolated and their RNAs were sequenced. The results identified a unique pattern  
55 of gene expression in the subpopulation of nociceptors projecting to the relevant peripheral tissue.  
56 Particularly interesting were sets of genes crucial to synapse formation and maturation – the ability  
57 of neurons to talk to each other – and genes involved in inflammatory responses, since treatment  
58 of inflammation of nervous tissue could also be important for therapeutic approaches. It is evident  
59 that the transition from acute to chronic pain occurs in distinct steps that involve numerous  
60 signaling pathways, providing a host of potential new drug targets.

61

## 62 **Introduction**

63 While spinal cord injury (SCI) is typically associated with loss of locomotor function, it can also  
64 result in chronic pain, affecting nearly 70% of patients with SCI (Finnerup et al. 2001). There are  
65 many categories of pain types affecting this population however, studies indicate that neuropathic  
66 pain below, or distal, to the level of injury is among the most common and difficult to treat (Defrin  
67 et al. 2001, Finnerup, Johannesen, Sindrup, Bach and Jensen 2001, Nees et al. 2016, Siddall and  
68 Loeser 2001, Yeziarski 2005). Of those patients reporting below-level neuropathic pain, half  
69 described their pain as severe or excruciating, causing significant disability in patients already  
70 disabled from loss of motor function (Defrin, Ohry, Blumen and Urca 2001, Siddall et al. 2003).  
71 With few patients able to achieve complete relief with current treatment options, research has  
72 focused on mechanisms responsible for SCI pain at the site of injury, with the intention of treating  
73 the injury itself to prevent subsequent development of pain.

74 Considerable advances have been made in understanding changes within the spinal cord, including  
75 how spinally mediated alterations contribute to SCI-induced pain by increasing spinal cord  
76 excitability, and by establishing a variety of factors that impact how incoming sensory stimulation  
77 is processed (Bruce et al. 2002, Meisner et al. 2010, You et al. 2008). However, this approach has  
78 not translated into successful pain management. This may be attributed to an incomplete  
79 understanding of the differential functions of specific afferent subtypes in SCI, and how afferents  
80 distal to the site of injury become sensitized in patients with chronic below-level pain (Thakur et  
81 al. 2014). The sensory system receives inputs from multiple cell types, and peripheral cell bodies  
82 within the dorsal root ganglion (DRG) are important targets for assessing sensory function and  
83 pain (Usoskin et al. 2015). Persistent activity from injured and non-injured afferent fibers  
84 contributes to development and maintenance of chronic pain following SCI (Gold and Gebhart  
85 2010).

86 Each sensory neuron has a unique pattern of gene expression that influences its modality-specific  
87 contribution to injury-induced pain (Le Pichon and Chesler 2014). To better understand the

88 underlying pathophysiology of below-level pain following SCI, it is necessary to identify changes  
89 in cells impacted by the injury. The skin is heavily innervated by a broad range of nociceptors, and  
90 previous work has shown that SCI can impact the function of cutaneous nociceptors below the  
91 level of injury (Berta et al. 2017). This has been demonstrated by sustained spontaneous activity  
92 in peripheral terminals and in cell bodies of sensory neurons projecting to the skin after initial SCI  
93 (Bedi et al. 2010, Carlton et al. 2009, Ritter et al. 2015, Wu et al. 2013, Yang et al. 2014).  
94 Additional work has demonstrated that blockade of peripheral afferents into the central nervous  
95 system can effectively mitigate patient discomfort and chronic pain (Basbaum et al. 2009,  
96 Campbell et al. 1988, Gold and Gebhart 2010). These data support the idea that the mechanisms  
97 generating and maintaining prolonged pain reside within the peripheral nervous system.

98  
99 In the present study, we identify specific transcriptional alterations in non-injured DRG distal to  
100 the site of injury. Using retrograde labeling from hairy hindpaw skin and flow cytometry, we  
101 isolated a nociceptor population projecting to sites distal to the spinal injury, free of surrounding  
102 neuronal and glial cells. This enabled identification of novel cutaneous nociceptor genes and  
103 predicted pathways not discernible by whole DRG tissue analyses.

104

## 105 **Methods**

106 **Animals.** Experiments were conducted with adult (8-12 week) female C57BL/6J mice (Jackson  
107 Laboratory, Bangor ME). Several chronic pain conditions have a higher prevalence in females,  
108 and numerous studies have reported higher pain prevalence in the SCI population among female  
109 patients (Cardenas et al. 2004). Women also report greater frequency, severity, and longer lasting  
110 pain, as well as neuropathic pain below the level of injury, in comparison to men (Cardenas, Bryce,  
111 Shem, Richards and Elhefni 2004). The majority of research examines SCI in male rodents and  
112 this study will add to what is known in the literature by focusing on female mice (Cardenas, Bryce,  
113 Shem, Richards and Elhefni 2004). Naïve animals were group housed; sham and spinal cord  
114 injured animals were individually caged. All animals were maintained on a 12:12-h light-dark  
115 cycle with a temperature-controlled environment, and given food and water ad libitum. All  
116 treatments and testing were approved by the University of Connecticut Health Center Institutional  
117 Animal Care and Use Committee.

118

119 **Spinal cord injury (SCI) procedure.** Animals were anesthetized by inhalation of isoflurane and  
120 a 1.0- cm dorsal midline skin sterile incision was made over T8-T11, as per Ma *et al.* (Ma et al.  
121 2001). Connective and muscle tissue were removed to expose the bone from T9-T10, and a  
122 laminectomy was performed at the T10 vertebral level. Spinal cord injury was produced by  
123 compression of the vertical plane of the spinal cord using a vessel clip with a closing pressure of  
124 15g (WPI, Sarasota, FL) for 1.0 minute, exerting pressure from side to side on the spinal cord.  
125 Sudden impact is produced by the rapid release of the vessel clip (Tator 2008). This injury is  
126 analogous to the majority of lesions in humans, as the model constitutes both contusion and  
127 compression (Marques et al. 2014). After removal of the clip a hemorrhagic ring at the site of  
128 compression is present. The wound is closed with coated vicryl absorbable sutures (Ethicon,  
129 Somerville, NJ). Mice were allowed to recover in warm cages for 24hr. All animals were  
130 administered antibiotics once immediately following surgery (5mg/kg gentamicin), as well as

131 subcutaneous saline for 4 days following surgery, without analgesics. Sham control mice received  
132 the same treatment excluding the vessel clip. Manual bladder expression on SCI mice was  
133 performed twice daily until mice were sacrificed. Mortality was less than 10% and typically  
134 occurred during the laminectomy due to excessive blood loss, or when postinjury weight loss  
135 required the animal to be sacrificed. Spinal cords collected at 4 days post-injury were most notably  
136 characterized by minimal cavitation and scar tissue that progressively diminished with increasing  
137 distance distal to the site of injury (~L1-2 vertebral level), analogous to previous studies that have  
138 characterized this injury model (Joshi and Fehlings 2002, Marques, de Almeida, Mostacada and  
139 Martinez 2014).

140

#### 141 **Behavioral tests**

142 ***Tail-flick test for thermal sensitivity.*** Mice were acclimated in 50mL tubes for 2 days prior to  
143 testing, 20 minutes per day. On testing days, mice were left in their home cage to acclimate to the  
144 test room for 30 minutes before testing (Bannon and Malmberg 2007). Latency to respond to  
145 thermal stimuli was measured by dipping the distal 1.5cm of the tail into a 50°C water bath  
146 (Ramabadran et al. 1989). The tail was removed from the water upon response, or after 15 seconds  
147 to prevent tissue damage. The stimulus was conducted 3 times, at 20 second intervals or less (Zhou  
148 et al. 2014). The first response was dropped, and the average latency to respond from two trials  
149 was used for analysis. Video recording and VLC software were used to determine tail-flick  
150 responses in milliseconds. Mice were tested for thermal sensitivity 1 day prior to surgery for  
151 baseline response thresholds, and at days 1, 3, 5, and 7 post-surgery. N=6 per group for each time  
152 point.

153

154 ***Mechanical sensitivity.*** To assess mechanical sensitivity, mice were confined in clear plastic  
155 containers placed on an elevated wire mesh platform. Prior to testing, mice were acclimated to the  
156 apparatus for 60 minutes. Mechanical reactivity was assessed on the plantar surface of the hind  
157 paw using a series of calibrated von Frey filaments according to the up-down method as described  
158 (Dixon 1980), and 50% response thresholds were compared across all conditions. Both hindpaws  
159 were tested for mechanical sensitivity, and collapsed across each group of mice per condition.  
160 Mice were tested for mechanical hypersensitivity 1 day prior to surgery for baseline response  
161 thresholds, and at days 1, 3, 5, and 7 post-surgery. N=6 per group for each time point.

162

163 ***Open Field Test.*** The open field test was conducted using a 16"x16" open-field container  
164 subdivided by infrared beams to track movement (San Diego Instruments, San Diego, CA). Data  
165 were acquired using the manufacturer's tracking software, which records ambulation movements  
166 based on beam breaks as well as central vs. peripheral beam break counts. All mice were placed  
167 in the same corner of the box before testing and allowed to freely explore for 10 minutes. Mice  
168 were tested 1 day prior to surgery for baseline locomotor behavior, and at days 1, 3, 5, and 7 post-  
169 surgery. Spinally injured mice were tested 1 day prior to surgery and 1 day post-surgery. Naive  
170 N=4 for each time point; Sham N=3-10 for each time point (within group design, tissue was  
171 collected for ELISAs for corresponding time points); N=4 SCI day 1.

172

173 **Cuprizone treated mice.** Female C57BL/6 mice (6-10 weeks old) were fed powdered milled  
174 chow mixed to contain a final concentration of 0.2% bis (cyclohexanone) oxaldihydrazone  
175 (cuprizone; Sigma-Aldrich, St. Louis, MO), with food and water available *ad libitum*. Each mouse  
176 received approximately 5g of chow per day, fresh cuprizone containing chow was prepared every  
177 7 days. Cuprizone feeding was maintained for 35 days, and tissue was collected for protein  
178 analyses on day 35. Digitized, non-overlapping electron micrographs of the corpus callosum were  
179 analyzed for unmyelinated axon frequency and g-ratios to assess effectiveness of cuprizone  
180 treatment (Wasko et al. 2019). N=5.

181  
182 **Cytokine ELISAs.** Spinal cord segments at the level of laminectomy (T8-T11) were collected  
183 from naïve, sham, SCI, or cuprizone treated mice immediately following perfusion with ice cold  
184 0.9% NaCl. Spinal cord segments were homogenized in ice-cold buffer containing 20mM TES,  
185 pH 7.4, 10mM mannitol, 0.3mg/mL phenylmethylsulfonyl fluoride, 2 $\mu$ g/mL leupeptin, 2 $\mu$ g/mL  
186 pepstatin, 2  $\mu$ g/mL benzamidine, 16 $\mu$ g/mL benzamidine, and 50 $\mu$ g/mL lima bean trypsin inhibitor  
187 at a concentration of 0.1g tissue per 1mL buffer (Mains et al. 2018). Homogenates were freeze-  
188 thawed three times, centrifuged (20min, 17,400g), and supernatants were collected.  
189 Approximately 60 $\mu$ g of protein per sample was used for each ELISA. The ELISA assays were  
190 performed according to the manufacturer's instructions (R&D systems mouse duo-sets IL-10, IL-  
191 6, IL-1 $\beta$ , TNF- $\alpha$ , completed with Ancillary Reagent Kit 2  $\square$   $\square$  Minneapolis, MN). The sample  
192 absorbance was read with an ELISA plate reader at 450nm; readings were also taken at 570nm to  
193 subtract optical background. The concentration was determined based on a standard curve. All  
194 results were normalized to amount of protein added per sample and graphed as pg/mg. Naïve, 1d  
195 Sham, 4d Sham, and 1d SCI N=4 mice; 5d and 7d Sham conditions N=3 mice.

196  
197 **Backlabeling procedure.** To backlabel DRG L2-L6 projecting to the hairy hindpaw skin, mice  
198 were anesthetized with isoflurane. 0.3% wheat germ agglutinin conjugated to an AF-488 dye  
199 (WGA-488, Thermo Fisher, Waltham, MA) in sterile PBS was injected into the sural, common  
200 peroneal, and saphenous nerve skin territories for retrograde labeling of DRG neurons (Berta,  
201 Perrin, Pertin, Tonello, Liu, Chamessian, Kato, Ji and Decosterd 2017, da Silva Serra et al. 2016).  
202 A total of 6 $\mu$ L of WGA-488 was injected 2 days prior to surgery by three 2 $\mu$ L injections in the  
203 lateral zones of each hindpaw (2 $\mu$ L per nerve territory) using a 10 $\mu$ L Hamilton Syringe and 30G  
204 needle. This was performed on both hindpaws of each mouse. This technique does not cause  
205 significant injury to the sensory afferents being studied.

206  
207 **Primary DRG neuron dissociation.** Mice were anesthetized 4 days post-surgery with an  
208 intraperitoneal injection of ketamine (100 mg/kg) plus xylazine (10 mg/kg) and perfused with ice  
209 cold 0.9% NaCl. A laminectomy was performed and L2-L6 DRG from both sides of the spinal  
210 column were collected into cold HBSS (KCl 5.4mM, NaCl 137mM, Glucose 5.6mM, Hepes  
211 20mM, pH 7.35 NaOH), after which the mice were sacrificed by decapitation. Sensory neuron  
212 dissociation was performed as described (Malin et al. 2007). Briefly, following collection, tissue  
213 was treated with 60U papain (Worthington), 1mg of cysteine, and 6 $\mu$ L of NaHCO<sub>3</sub> in 1.5mL  
214 HBSS at 37°C for 10 min. Tissue was then treated with 12mg collagenase II (Worthington,  
215 Lakewood, NJ) and 14mg dispase (Roche, Basel, Switzerland) in 3mL HBSS at 37°C for 20 min,

216 washed, and triturated with fire polished glass Pasteur pipettes in 1mL of DMEM (Gibco Thermo  
217 Fisher Scientific, Waltham, MA) supplemented with FBS (Hyclone, Logan, UT) and pen/strep  
218 (Gibco). The cell suspension was pelleted (1 min, 80g), DMEM was removed, and cells were re-  
219 suspended in a modified solution (Citri et al. 2011) containing 140mM NaCl, 5mM KCl, 10mM  
220 Hepes, 10mM glucose, 0.1% Bovine Serum Albumin, pH 7.4. After re-suspension, cells were  
221 strained through a 70µm cell strainer and placed on ice in the modified solution until fluorescence  
222 activated cell sorting (FACS).

223  
224 **Imaging Flow Cytometry.** Single cell suspensions of cells isolated from *in situ* WGA-488 labeled  
225 DRG were live-stained using Hoechst 33342 (10µg/mL, Thermo Fisher) and propidium iodide  
226 (PI) (1µg/mL), and analyzed on an Amnis ImageStreamX Mark II imaging flow cytometer  
227 (Luminex Co., Austin, TX). Fluorescent cell images were captured using a 60x objective lens with  
228 excitation from a 405nm laser at 20mW power and a 488nm laser at 200mW power. Images of in-  
229 focus nucleated WGA AF488-positive cells were identified and electronically gated using IDEAS  
230 software (Amnis, v6.2.183, Seattle, WA).

231  
232 **Flow cytometry and cell sorting.** Neurons labeled with WGA-488 dye *in situ* in the DRG were  
233 purified by fluorescence activated cell sorting 4 days post-surgery. Following primary dissociation  
234 of DRGs L2-L6, single cell suspensions were analyzed and sorted using a BD FACS Aria II cell  
235 sorter (Becton Dickinson) set up with a 130µm nozzle at 12 PSI in order to gently isolate cells  
236 between 10 and 30µm. Single live neurons were defined by electronic gating in FACS DIVA  
237 software (BD, ver. 8.01) using forward and side angle light scatter, omission of propidium iodide  
238 (PI, 1µg/mL), and AF488 fluorescence. All fluorescence gates were confirmed using fluorescence  
239 minus one controls (e.g.: a sample of cells from unlabeled DRG was used to gate for AF488  
240 positive cells and a sample of cells not treated with PI was used to set the live cell gate). WGA-  
241 488 positive cells were sorted directly into lysis buffer (NucleoSpin RNA XS Kit, Machery-Nagel,  
242 Bethlehem, PA) and immediately placed on dry ice until RNA extraction.

243  
244 **RNA extraction and RNA sequencing.** RNA from FACS sorted cells was isolated using  
245 NucleoSpin RNA XS Kit, including a DNA digestion step but without carrier RNA step. Before  
246 library preparation RNA quality and integrity was tested for each sample using the Agilent High  
247 Sensitivity RNA Screen Tape on the Agilent TapeStation 2200 (Agilent Technologies, Santa  
248 Clara, CA). RNA with RIN values  $\geq 6.7$  (minimum 6.7, maximum 9.9, average 7.3) was further  
249 processed for RNA sequencing. Library preparation was performed using the Illumina sequencing  
250 kit for high output 75-cycles for 25-30M total single end reads per sample. DESeq2 analyses  
251 (<https://bioconductor.org/packages/release/bioc/html/DESeq2.html>) of differential expression  
252 were performed, and outliers beyond 30-50% of the mean for each group of animals were  
253 eliminated (Conesa et al. 2016, Labaj and Kreil 2016, Love et al. 2014, Wu and Wu 2016).

254  
255 **Pathway Analysis.** Data was analyzed by Ingenuity Pathway Analysis (IPA; Qiagen,  
256 Germantown, MD). An overlap of significance for DESeq2 comparisons plus an RPKM cutoff  $>10$   
257 were required for transcripts to be included for IPA analysis. We analyzed 125 transcripts for

258 comparisons between SCI and naïve groups, and 560 transcripts for comparisons between SCI and  
259 sham groups.

260

## 261 **qPCR validation**

262 **Pre-amplification of cDNA for Gene Expression.** cDNA was generated from RNA samples from  
263 FACS sorted cells with the iScript Reverse Transcription Supermix (#1708840 Bio-Rad, Hercules,  
264 CA), N=6 per condition. Target-specific preamplification was performed on cDNA generated from  
265 RNA samples using SsoAdvanced PreAmp Supermix (#1725160 Bio-Rad) containing Sso7d  
266 fusion polymerase. Briefly, 20  $\mu$ L of cDNA was preamplified in a total volume of 50  $\mu$ L  
267 containing 25  $\mu$ L of 2x SsoAdvanced PreAmp Supermix and 21 primer pairs, 50nM of each  
268 primer. Preamplification was performed at 95°C for 3 min followed by 12 cycles of amplification  
269 at 95°C for 15 seconds and 58°C for 4 min. Samples were moved directly to ice and stored at -  
270 80°C. Preamplified cDNA were diluted 1:5 with H<sub>2</sub>O.

271

272 **qPCR.** Following cDNA synthesis and preamplification, qPCR was performed using the primers  
273 listed in **Suppl. 6**. All primers had calculated melt temperatures of 59.5-63.5°C, and all products  
274 were 111-143 bp in length, as verified by agarose gel electrophoresis. qPCR was performed at  
275 95°C, 2 min; 95°C, 10 seconds; 55 °C, 15 seconds; and 72°C, 40 seconds, repeating the second  
276 through fourth steps for a total of 40 cycles in a Bio-Rad CFX Connect Optics Module machine.  
277 iQ SYBR Green Supermix (#1708882 Bio-Rad) was used for linear detection of qPCR results.  
278 Hypoxanthine phosphoribosyltransferase (Hprt) was used as the most constant normalizer  
279 transcript, based on the RPKM data (Klenke et al. 2016, Lima et al. 2016).

280

281 **Statistical analyses.** Differences between groups were compared using Student's t-test or  
282 ANOVA, followed by Tukey's posttest, Bonferroni's multiple comparisons test, or by unpaired  
283 Student's t-test. P-values <0.05 were considered statistically significant. Statistics on PCR data  
284 were conducted using delta CT values. Heat maps were generated by Microsoft software (Excel),  
285 hierarchical clustering was generated by Gene Cluster 3.0 and visualized using Java TreeView  
286 (Baek et al. 2017, de Hoon et al. 2004). All other data were plotted using Prism 6 (GraphPad  
287 Software, San Diego, CA). R studio was utilized for differential expression analysis; Prism  
288 software was used for all other statistical tests.

289

## 290 **Results**

291 **Characterization of behavioral and inflammatory phenotypes of sham mice.** To determine an  
292 optimal time point to observe transcriptional changes contributing to the transition from acute to  
293 chronic pain, we tested behavioral differences between naïve and sham operated mice. This was  
294 to ensure that changes within the DRG were due to injury to the spinal cord itself, not to the  
295 laminectomy performed in both injured and sham mice. Specifically, we tested naïve and sham  
296 mice for open field locomotor differences 1, 3, 5, and 7 days post-surgery (**Fig.1A1**). Naïve and  
297 sham mice did not differ significantly at any of the time points tested, including as early as 1 day  
298 post-surgery. To ensure that SCI mice (T10 compression-clip injury) did exhibit behavioral  
299 differences and locomotor deficits following injury, we compared SCI mice to naïve and sham  
300 mice for open field behavior 1 day post-injury (**Fig.1A2**). SCI mice exhibited substantially

301 decreased total ambulation (one-way ANOVA,  $p=0.0059$ , Tukey's multiple comparisons test,  
302 naïve  $**p<0.005$ , sham  $*p<0.05$ ) following injury, as expected, although time spent in the  
303 periphery did not differ (**Suppl.1A**). Additional tests for mechanical (von Frey) and thermal (hot  
304 water tail-flick) hypersensitivity showed that naïve and sham conditions did not differ significantly  
305 at any time point (**Fig.1B**). We did not examine SCI mice for thermal or mechanical sensitivity, as  
306 paralysis below the level of injury prohibited below-level sensitivity testing and previous work  
307 using the clip-compression model has not demonstrated significant changes in above-level  
308 sensitivity following SCI (Bruce, Oatway and Weaver 2002). The development of chronic pain at  
309 later time points following clip-compression models of SCI (in addition to several other models)  
310 has already been well characterized. Therefore we focused on early time points after injury, to  
311 identify contributions to the onset of pain, rather than changes after chronic pain has already  
312 developed (Bruce, Oatway and Weaver 2002, Gaudet et al. 2017, Nakae et al. 2011).

313  
314 Previous work has highlighted the importance of inflammatory cytokines within the CNS to  
315 facilitate the transduction of noxious stimuli in neuropathic pain (Cook et al. 2018). Thus, we  
316 examined post-surgical changes in inflammation, using ELISAs to analyze common cytokine  
317 markers to ensure that sham mice did not differ significantly from naïve mice following the  
318 removal of bone and muscle. We did not observe significant differences in inflammatory cytokine  
319 levels (TNF- $\alpha$ , IL-6, IL-1 $\beta$ , IL-10) in extracts of spinal cord segments (T8-T11) in naïve or sham  
320 mice at 1, 4, 5, and 7 days post-surgery (**Fig.1C, Suppl.1B**). Spinal cords from SCI mice had  
321 significantly increased levels of IL-6 and IL-10 in comparison to naïve controls (one-way  
322 ANOVA, Bonferroni's multiple comparisons test;  $*p<0.05$ ,  $**p<0.005$ , respectively). When  
323 compared to sham conditions, spinal cords from SCI mice had significantly increased levels of IL-  
324 10 in comparison to 4d, 5d, and 7d sham conditions (one-way ANOVA, Bonferroni's multiple  
325 comparisons test;  $***p<0.001$ ,  $**p<0.005$ ,  $**p<0.005$ , respectively). As a positive control, we  
326 tested cuprizone-treated mice (a model of multiple sclerosis), which are known to secrete  
327 proinflammatory cytokines at the end of 5 weeks of treatment (Mukhamedshina et al. 2017).  
328 Cuprizone-treated mice showed expected increases in levels of TNF- $\alpha$ , IL-1 $\beta$ , and IL-10 in  
329 comparison to naïve controls (one-way ANOVA, Bonferroni's multiple comparisons test;  
330  $*p<0.05$ ,  $**p<0.005$ ,  $**p<0.005$ , respectively) (Schmitz and Chew 2008). Similarly, in  
331 comparison to sham mice, spinal cord extracts from cuprizone-treated mice had significant  
332 increases in IL-1 $\beta$  at the 1d sham timepoint, and IL-10 at the 4d, 5d, and 7d sham timepoints (one-  
333 way ANOVA, Bonferroni's multiple comparisons test;  $*p<0.05$ ,  $****p<0.0001$ ,  $**p<0.005$ ,  
334  $***p<0.001$ , respectively). Behavioral testing and cytokine analyses did not reveal differences  
335 between naïve and sham mice at any time point.

336  
337 **Confirmation of cell population specific labeling of cutaneous nociceptors.** Because the  
338 laminectomy did not significantly affect behavior or inflammatory responses in sham mice, we  
339 determined an optimal time point to study the transition of acute to chronic pain based upon  
340 established characteristics of nociceptors following SCI. The inflammatory cytokine assays  
341 demonstrated that SCI causes major inflammation compared to sham controls at 4d after injury  
342 (**Fig.1C, Suppl.1B**). In addition, previous studies have documented onset of spontaneous activity  
343 in nociceptors distal to the site of SCI as early as 3 days post-injury; increased activity persisted



344 for at least 8 months (Bedi, Yang, Crook, Du, Wu, Fishman, Grill, Carlton and Walters 2010).  
345 Thus, it is possible that the transition to chronic pain begins around 3 days after SCI, and this  
346 transition is not due to laminectomy, as nociceptors isolated from sham mice show no significant  
347 changes in spontaneous activity (Bedi, Yang, Crook, Du, Wu, Fishman, Grill, Carlton and Walters  
348 2010, Yang, Wu, Hadden, Odem, Zuo, Crook, Frost and Walters 2014). Subsequently, we chose  
349 4 days post-injury to assess transcriptional changes in nociceptors below the level of injury.

350  
351 To perform transcriptional profiling on nociceptors that project to the cutaneous skin after injury,  
352 we injected wheat germ agglutinin conjugated to an AF-488 dye (WGA-488) into the sural,  
353 common peroneal, and saphenous nerve skin territories for retrograde labeling of DRG neurons.  
354 Next, we performed compression-clip SCI or sham surgeries at the T10 vertebral level 2 days post-  
355 WGA injection, and collected L2-L6 DRG for dissociation 4 days post-injury (**Fig.2A**). Based on  
356 the vertebral level at which we performed SCI, the DRG collected were located below the level of  
357 injury, thus our analysis was comprised of non-injured nociceptors that do not project directly to  
358 the lesion site. Flow cytometry confirmed that our cell population of interest (cutaneous  
359 nociceptors) was positively labeled with WGA-488 (**Fig.2B**). We also observed non-labeled  
360 (WGA-488) cells and dead cells (propidium iodide, PI+), to be excluded from cell sorting and  
361 analysis (**Fig. 2B**). As expected, a significant number of viable small nociceptor cells were  
362 excluded in this analytical approach, to avoid including RNAs from non-nociceptor cells or  
363 attached fragments of dead cells (examples in **Fig. 2C**) (Lopes et al. 2017, Megat et al. 2019,  
364 Thakur, Crow, Richards, Davey, Levine, Kelleher, Agle, Denk, Harridge and McMahon 2014).

365  
366 **FACS purification of DRG nociceptors projecting to the cutaneous hind paw.** We performed  
367 fluorescence-activated cells sorting (FACS) purification of nociceptor populations from naïve,  
368 sham, and SCI adult (8-12 week old) female mice (n=5 per condition). We pooled DRGs from  
369 lumbar regions L2-L6 on either side of the spinal column to ensure all DRGs isolated would have  
370 projections to the hairy hind paw skin. DRG cells were enzymatically dissociated and subjected to  
371 flow cytometry, to gently isolate positively labeled cells between 10 and 30µm; propidium iodide  
372 staining was used to identify dead cells. All conditions were gated on DRG from naïve mice that  
373 did not receive WGA-488 injections, enabling purification of positively labeled cells (**Fig.3A**).  
374 Analysis of our flow cytometry data shows that we were successful in retrogradely labeling DRG  
375 neurons projecting to hairy hind paw skin. Many positively labeled neurons were part of cell  
376 aggregates, limiting retrieval of the single cell population of interest to ~2% of all dissociated cells  
377 per animal (**Fig.3B**). This percentage amounted to approximately 3,000 cells per mouse, a suitable  
378 representation of this cell population in agreement with previous studies (Berta, Perrin, Pertin,  
379 Tonello, Liu, Chamesian, Kato, Ji and Decosterd 2017, Goswami et al. 2014, Thakur, Crow,  
380 Richards, Davey, Levine, Kelleher, Agle, Denk, Harridge and McMahon 2014, Usoskin, Furlan,  
381 Islam, Abdo, Lonnerberg, Lou, Hjerling-Leffler, Haeggstrom, Kharchenko, Kharchenko,  
382 Linnarsson and Ernfors 2015). DRG populations were sorted directly into lysis buffer and placed  
383 on dry ice to preserve transcriptional profiles at the time of isolation. RNA quality was tested using  
384 the Agilent TapeStation; a representative image of an RNA sample following FACS purification  
385 is shown (**Fig.3C**).

386

387 **Major characteristics of somatosensory mediators in the purified neuron population.** We  
388 used the RNA sequencing data to evaluate the neuronal population that had been isolated. Scn10a,  
389 which encodes Na<sub>v</sub>1.8, is present in 80-90% of nociceptors and Trpv1 serves as a marker for the  
390 peptidergic population of nociceptors (Basbaum, Bautista, Scherrer and Julius 2009, Harriott and  
391 Gold 2009, Wu, Yang, Crook, O'Neil and Walters 2013). RPKM values of 1000 for Scn10a and  
392 400 for Trpv1 confirm that FACS purified cells express high levels of these nociceptor markers  
393 **Fig.4A**). The low RPKM values observed for Parvalbumin (Pvalb), a glial transcript also found  
394 in large diameter proprioceptors and A $\beta$  neurons, and Gfap (glial fibrillary acidic protein), another  
395 marker for glial cells, confirmed the absence of the non-nociceptive sensory neurons responsible  
396 for touch and proprioception (A $\beta$  and A $\delta$  neurons) and the absence of satellite glial cells from our  
397 purified nociceptor population (**Fig.4B**) (Huang et al. 2013, Le Pichon and Chesler 2014).  
398 Previous studies have confirmed that intact DRG as well as unsorted dissociated DRG yield much  
399 higher levels of nonneuronal markers (Thakur, Crow, Richards, Davey, Levine, Kelleher, Agle, Agley,  
400 Denk, Harridge and McMahon 2014). This highlights the importance of excluding cell aggregates  
401 during cell sorting (**Fig.3**) to avoid the analysis of transcripts from cells outside of the target  
402 population of nociceptors.

403  
404 We next analyzed gene expression patterns for known functional mediators of somatosensation  
405 (Chiu et al. 2014, Le Pichon and Chesler 2014, Usoskin, Furlan, Islam, Abdo, Lonnerberg, Lou,  
406 Hjerling-Leffler, Haeggstrom, Kharchenko, Kharchenko, Linnarsson and Ernfors 2015). The  
407 purified cutaneous nociceptors displayed high expression levels of genes involved in  
408 thermosensation and nociception, such as specific Trp channels (notably Trpv1), sodium channels  
409 (Scn9a, 10a, 11a) and Prph (peripherin) (**Fig.4C**). Markers for non-peptidergic nociceptors were  
410 abundant, such as Mrgprd (Mas-Related G-Protein Coupled Receptor Member D), Runx1 (Runt  
411 related transcription factor 1), Ret (Ret proto-oncogene), and Trpc3 (transient receptor potential  
412 cation channel C3). As expected, transcripts enriched in peptidergic nociceptors were present, such  
413 as Calca and Calcb (Calcitonin Related Polypeptides) and Tac1 (the tachykinin precursor for  
414 peptides such as Substance P), the peptide processing enzyme PAM (peptidylglycine  $\alpha$ -amidating  
415 monooxygenase), as well as Npy1r, one of the most abundant Npy receptors (Basbaum, Bautista,  
416 Scherrer and Julius 2009, Julius and Basbaum 2001). However, genes encoding proteins involved  
417 in itch, such as Nppb (brain natriuretic peptide) and Hrh1 (histamine receptor H1) were only  
418 expressed at low levels (Usoskin, Furlan, Islam, Abdo, Lonnerberg, Lou, Hjerling-Leffler,  
419 Haeggstrom, Kharchenko, Kharchenko, Linnarsson and Ernfors 2015). Similarly, genes  
420 responsible for proteins involved in tactile function, including Trpc1 (Transient Receptor Potential  
421 Cation Channel Subfamily C Member 1), and those responsible for proprioception, such as Runx3  
422 (Runt related transcription factor 3), exhibited low expression levels. (Le Pichon and Chesler 2014)  
423 In contrast, nerve growth factor receptors (Neurotrophic Receptor Tyrosine Kinases 1-3 [Ntrk])  
424 were all expressed at high levels. High expression levels were also observed for transcripts of the  
425 two major subpopulations of nociceptors; peptidergic and non-peptidergic (**Fig.4D**).

426  
427 **Gene expression profiling and enrichment patterns in injured and non-injured cutaneous**  
428 **nociceptors after SCI.** To further assess expression profiles of the purified nociceptor population  
429 and differences among naïve, sham, and SCI conditions within this nociceptor-enriched

430 population, we focused on expression patterns of gene families that mediate general neuronal  
431 functions (Berta, Perrin, Pertin, Tonello, Liu, Chamesian, Kato, Ji and Decosterd 2017, Chiu,  
432 Barrett, Williams, Stochlic, Lee, Weyer, Lou, Bryman, Roberson, Ghasemlou, Piccoli, Ahat,  
433 Wang, Cobos, Stucky, Ma, Liberles and Woolf 2014). We used differential expression analysis  
434 (DESeq2) to analyze significant changes between SCI and naïve or SCI and sham populations  
435 (Love, Huber and Anders 2014). Pairwise comparisons of significant genes generated by DESeq2  
436 analysis yielded many differentially expressed genes in each subset (**Suppl.2A-B**). We also  
437 assessed differences between sham and naïve populations to exclude significant transcript changes  
438 due to laminectomy (**Suppl.2C**).

439  
440 We focused on expression patterns of gene families which mediate neuronal functions and  
441 contribute to pain phenotypes, and found both high expression levels and significant differences  
442 within the chloride channel family, Trp channels, glutamate receptors, GABA receptors, potassium  
443 channels, sodium channels, and piezo channels (**Fig.5A-G**, p-values in **Table 1**). We also  
444 examined ASICs (acid-sensing ion channels), calcium channels, glycine receptors, and P2rx and  
445 P2ry families (purinergic receptors), because these are widely studied gene families known to be  
446 involved in the development or maintenance of chronic pain (**Suppl.3A-E**). Many channels and  
447 receptors were highly expressed within this cell population, but no significant changes among the  
448 transcripts were demonstrated for any condition (**Suppl.3**).

449  
450 Several transcription factors were highly expressed, including Stat3 (signal transducer and  
451 activator of transcription 3), Fos (FJB osteosarcoma oncogene), and Jun (Jun Proto-Oncogene)  
452 **Suppl.4**). Evidence from various models of neuropathic pain implicates these transcription factors  
453 in the development or maintenance of chronic pain (Dominguez et al. 2008, Harris 1998, Naranjo  
454 et al. 1991, Tsuda et al. 2011, Xue et al. 2014). Stat3 inhibitors are used to treat peripheral nerve  
455 injury-induced hyperexcitability within dorsal horn neurons, pain behaviors, chronic constriction  
456 injury, and signaling of IL-6 cytokines (Dominguez, Rivat, Pommier, Mauborgne and Pohl 2008,  
457 Tsuda, Kohro, Yano, Tsujikawa, Kitano, Tozaki-Saitoh, Koyanagi, Ohdo, Ji, Salter and Inoue  
458 2011, Xue, Shen, Wang, Hui, Huang and Ma 2014). Previous studies also show that Fos links  
459 extracellular events to long-term intracellular changes (such as noxious stimuli) and have  
460 established Fos expression as a valid tool to study nociceptive changes (Harris 1998, Naranjo,  
461 Mellstrom, Achaval and Sassone-Corsi 1991). Jun also contributes to persistent pain phenotypes  
462 following injury (Naranjo, Mellstrom, Achaval and Sassone-Corsi 1991). DESeq2 analysis  
463 determined additional transcription factors to be significantly altered by SCI (**Suppl.5**).

464  
465 **Backlabeled FACS-sorted cutaneous cell transcriptome is distinguished by novel nociceptor-**  
466 **enriched gene patterns.** To gain further insight into differentially regulated genes in our isolated  
467 population of neurons, we compared our dataset with similar studies on isolated DRGs from  
468 publicly available datasets (**Fig. 6**) (Hu et al. 2016, Megat, Ray, Tavares-Ferreira, Moy,  
469 Sankaranarayanan, Wangzhou, Fang Lou, Barragan-Iglesias, Campbell, Dussor and Price 2019,  
470 Thakur, Crow, Richards, Davey, Levine, Kelleher, Agle, Denk, Harridge and McMahon 2014,  
471 Usoskin, Furlan, Islam, Abdo, Lonnerberg, Lou, Hjerling-Leffler, Haeggstrom, Kharchenko,  
472 Kharchenko, Linnarsson and Ernfors 2015). ). Unsupervised hierarchical clustering of the top 260

473 genes revealed that a large number of genes display distinct patterns of expression dependent upon  
474 the technique used; isolated neurons from all DRG by translating ribosome affinity purification  
475 (TRAP) using the Nav1.8<sup>Cre</sup> mouse (Megat, Ray, Tavares-Ferreira, Moy, Sankaranarayanan,  
476 Wangzhou, Fang Lou, Barragan-Iglesias, Campbell, Dussor and Price 2019), single cell isolation  
477 from L3-5 DRG (Hu, Huang, Hu, Du, Xue, Zhu and Fan 2016), single cell isolation from L4-L6  
478 DRG (Usoskin, Furlan, Islam, Abdo, Lonnerberg, Lou, Hjerling-Leffler, Haeggstrom,  
479 Kharchenko, Kharchenko, Linnarsson and Ernfors 2015), and magnetic cell sorting (MACS) using  
480 the Nav1.8 TdTomato mouse (Thakur, Crow, Richards, Davey, Levine, Kelleher, Agle, Denk,  
481 Harridge and McMahon 2014) (**Fig. 6A**). We found that, while our cutaneous nociceptor-enriched  
482 population clustered most closely with the datasets of both TRAP sorted and unsorted DRG from  
483 *Megat et. al* (Megat, Ray, Tavares-Ferreira, Moy, Sankaranarayanan, Wangzhou, Fang Lou,  
484 Barragan-Iglesias, Campbell, Dussor and Price 2019), our isolated population can be  
485 characterized by its own unique data set. Notably, datasets from studies analyzing single cell  
486 transcriptomes cluster together, while studies utilizing either TRAP or MACS cluster with their  
487 own respective unsorted DRG controls, suggesting that while techniques for isolating specific cell  
488 populations can be useful, some variations in gene expression may be attributed to individual  
489 differences in cell isolation and RNA extraction methods.

490  
491 To better characterize enriched genes within our population, we graphed the expression of the 25  
492 most significantly enriched genes in our data set in comparison to the same data sets used for  
493 hierarchical clustering (**Fig. 6B**). While many of the genes have similarly high expression levels,  
494 several genes were unique to our isolated population, including Dgkh (diacylglycerol kinase),  
495 Ank2 (ankyrin 2), Phf24 (PHD finger protein 24), Srrm2 (serine/arginine repetitive matrix 2), Fasn  
496 (fatty acid synthase), Pirt (phosphoinositide-interacting regulator of transient receptor potential  
497 channels), and Plekha6 (pleckstrin homology domain containing, family A member 6). We also  
498 compared the expression pattern of our naïve nociceptor-enriched population to the various  
499 datasets by again examining known neuronal markers of somatosensation (**Fig. 6C**). As predicted,  
500 all of the sorted populations exhibit relatively high expression levels of gene transcripts associated  
501 with thermosensation, nociception, or neurotrophic receptors, and comparatively low levels of  
502 genes associated with itch, tactile function, or proprioception. It is evident that our cutaneous,  
503 nociceptor-enriched population can be defined by its distinct gene expression patterns, in particular  
504 high expression levels of the Trp family of genes listed in **Fig. 6C**, as well as Ntrk2, Ntrk3, and  
505 Gfra3 neurotrophic receptors.

506  
507 **Ingenuity pathway analysis (IPA) identified significantly different canonical pathways from**  
508 **cutaneous nociceptors after SCI.** Based on DESeq2 analysis, levels of several hundred  
509 transcripts in the nociceptor-enriched population were altered by SCI. We restricted IPA input lists  
510 to genes that had RPKM values greater than 10 and were statistically different (SCI vs. Naïve or  
511 SCI vs. Sham) by DESeq2 analysis (**Fig. 7A, B**). Transcripts that exhibited large fold changes  
512 included Mrgprb5, Hal, Chrb4, Cap2, Sez6l, Calb1, Prokr2, Rxfp1, Nxpe2, and Arap3 (**Fig. 7A,**  
513 **B**). These genes did not appear in any common significant canonical pathways. IPA identified  
514 several pathways that are considered important for inflammatory processes, pain transduction, or  
515 the maintenance of chronic pain (**Fig. 7C**). This includes calcium signaling, Cxcr4 signaling,

516 neuropathic pain signaling in dorsal horn neurons, opioid signaling, purinergic receptor signaling  
517 and synaptic long term potentiation (**Fig.7C**) (Julius and Basbaum 2001, Walters 2012, Walters  
518 2018). The current study focused on significant changes due to SCI pain and not due to post-  
519 surgical pain (i.e. changes between sham vs. naïve groups).

520

521 **Validation of RNASeq data using qPCR.** We used qPCR to confirm changes in transcripts of  
522 interest from our RNAseq data set. To validate qPCR and RNAseq comparisons, we compared  
523 qPCR or RPKM Log<sub>2</sub> transcript levels of SCI and sham genes of interest (**Fig.7D**). SCI and sham  
524 qPCR fold change results were analogous to the RNAseq fold change data set. We focused on the  
525 synaptogenesis pathway in particular, as it includes several genes present in overlapping canonical  
526 pathways, including changes in receptors involved in organization of excitatory signaling (Ephb)  
527 and synapses which may be involved in development of chronic pain (TrkB and BDNF). We  
528 validated receptors for significant genes in the synaptogenesis pathway, and genes considered  
529 possible contributors to pain that also showed significant differences between conditions Gabrg3,  
530 Il6st, Kcng3, Piezo2, Scn5a, Trpc3) (De Jongh et al. 2003, Deng et al. 2018, Devor 2006,  
531 Eijkelkamp et al. 2013, Guptarak et al. 2013, Szczot et al. 2018, Waxman et al. 1999, Wickenden  
532 2002, Xia et al. 2015). Additional targets were chosen in order to validate isolation of the correct  
533 cell population (Scn10a). Samples for qPCR were collected by backlabeling cutaneous afferents  
534 and cell sorting, consistent with samples generated for RNAseq analysis. Following cDNA  
535 synthesis, samples were subjected to gene target-specific preamplification using the same primers  
536 used for qPCR (**Suppl.6**). Hprt was chosen as the housekeeping gene for qPCR analysis because  
537 it was the most constant normalizer transcript from the RPKM data across all 15 mice in the present  
538 study (Klenke, Renckhoff, Engler, Peters and Frey 2016, Lima, Gaiteiro, Peixoto, Soares, Neves,  
539 Santos and Ferreira 2016).

540

541 **IPA network analysis revealed several regulatory interrelationships after SCI.** We used IPA  
542 upstream network analysis to further interpret the function of the several hundred transcripts  
543 significantly altered determined by DESeq2. This method predicted several transcriptional  
544 regulators associated with altered expression levels of downstream target genes following SCI  
545 **Fig.7E**). The upstream regulator molecules graphed do not show a significant change in RNA  
546 expression in response to injury. However, these targets are activated by posttranslational  
547 modifications that can alter many of the downstream molecules within its network.

548

## 549 **Discussion**

550 SCI initiates persistent molecular changes in nociceptors, similar to inflammation in models of  
551 peripheral injury (Djoughri et al. 2001, Xie et al. 2005). Several studies of SCI pain have evaluated  
552 mechanical hypersensitivity from von Frey stimulation above and below the level of thoracic  
553 injury, in addition to testing tail withdrawal from heat stimuli (Kramer et al. 2017, Shiao and Lee-  
554 Kubli 2018). Additional behavioral studies have demonstrated that SCI animals exhibit significant  
555 increases in mechanical and thermal hypersensitivity compared to naïve and sham animals,  
556 beginning at 1 month and persisting for several months post-injury (Bedi, Yang, Crook, Du, Wu,  
557 Fishman, Grill, Carlton and Walters 2010, Carlton, Du, Tan, Nestic, Hargett, Bopp, Yamani, Lin,  
558 Willis and Hulsebosch 2009). However, other studies have asserted that operant behavioral tasks,

559 such as conditioned place preference, are required to effectively study below-level pain in animals  
560 (Yeziarski 2005). The present study focused on the transition from acute to chronic pain, in the  
561 absence of early pain-related behavior, to examine transcriptional differences that occur at much  
562 earlier time points rather than a point at which chronic pain is already present. We first tested  
563 behavioral differences between naïve and sham mice to identify changes due to the laminectomy,  
564 not the spinal cord injury itself, to better determine a time point that captures the transition from  
565 acute to chronic pain following SCI. For example, removal of bone and muscle alone could trigger  
566 chronic pain-like symptoms, analogous to post-surgical pain reported in humans (Woolf 2011).  
567 Surprisingly, there were no significant differences between naïve and sham mice at any time point  
568 (**Fig.1A, B**), suggesting that the laminectomy did not produce any locomotor differences or  
569 behavioral hypersensitivity 1-7 days post-surgery in mice. By contrast, the spinal cord injury  
570 produced clear locomotor differences (**Fig.1A2**).

571

### 572 *Injury and inflammation in SCI*

573 We also considered post-surgical inflammation, using cytokine ELISAs to assess changes in the  
574 spinal cord at the level of laminectomy (T8-T11). We wanted to assess changes in cytokine levels  
575 for two main reasons; firstly, to confirm that sham mice did not exhibit differences from naïve  
576 mice at key timepoints in comparison to SCI mice, and secondly to determine whether sham mice  
577 exhibited a prolonged inflammatory response, which could potentially be correlated to the  
578 development of chronic pain (Krames 2014). Both pro-inflammatory cytokines TNF- $\alpha$  and IL-1 $\beta$   
579 have been studied in neuroprotection models of SCI. IL-6 has been implicated in  
580 neurodegeneration after central nervous system (CNS) injury, and the anti-inflammatory cytokine  
581 IL-10 exhibits neuroprotective effects (Donnelly and Popovich 2008, Schmitz and Chew 2008,  
582 Zhang et al. 2019). However, we did not find any significant cytokine changes between naïve and  
583 sham mice within 7 days of injury, indicating that the laminectomy did not produce a significant  
584 inflammatory response at the time points tested. As a positive control for the cytokine ELISAs  
585 (Suzuki and Kikkawa 1969), we used the cuprizone model for multiple sclerosis. Key pathological  
586 features of the treatment include secretion of proinflammatory cytokines such as TNF- $\alpha$  and IL-  
587 1 $\beta$  (Schmitz and Chew 2008). Consistent with previous findings, mice treated with cuprizone  
588 exhibited significant increases in TNF- $\alpha$ , IL-1 $\beta$ , and IL-10 relative to naïve mice (**Fig.1C**)  
589 (Schmitz and Chew 2008).

590

591 Tissue injury can also lead to prolonged functional changes and hyperalgesia that are accompanied  
592 by behavioral changes due to increased spontaneous activity of nociceptors (Bedi, Yang, Crook,  
593 Du, Wu, Fishman, Grill, Carlton and Walters 2010, Carlton, Du, Tan, Nesic, Hargett, Bopp,  
594 Yamani, Lin, Willis and Hulsebosch 2009, Walters 2012). Spontaneous activity in nociceptors  
595 following SCI begins at 3 days after injury and persists for at least 8 months (Bedi, Yang, Crook,  
596 Du, Wu, Fishman, Grill, Carlton and Walters 2010). This increase in nociceptor activity elicits  
597 changes within the spinal dorsal horn, which receives input from these nociceptors, ultimately  
598 contributing to spontaneous pain (Dubner and Ruda 1992, Wu et al. 2001). However, the source  
599 of hyperexcitability of nociceptors after injury is still unknown. Because spontaneous activity in  
600 nociceptors begins by 3 days post-injury, and has been correlated with the generation of persistent  
601 pain, we chose to observe transcriptomic changes immediately after this time point at 4 days post-

602 injury (Xie, Strong, Meij, Zhang and Yu 2005). We intentionally excluded large sensory afferents  
603 from our experimental model, as the response to SCI by these afferents is transient and has not  
604 been directly correlated with pain transduction (Hu, Huang, Hu, Du, Xue, Zhu and Fan 2016,  
605 Huang et al. 2006). We focused on an anatomically defined population of nociceptors (projecting  
606 from below the level of SCI to hairy hindpaw skin) by back-labeling from peripheral afferent  
607 terminals and sorting based on both fluorescence and size. These neurons represent ~10% of  
608 dissociated DRG tissue and have a distinct transcriptome (Thakur, Crow, Richards, Davey, Levine,  
609 Kelleher, Agle, Denk, Harridge and McMahon 2014). Our approach to identifying anatomically  
610 defined small nociceptors is distinct from single cell transcriptome isolation based on the  
611 expression of the sodium channel *Scn10a* (*Nav1.8*) or expression of *advillin* (*Avil*, a marker for  
612 all neural crest neurons) (Lopes, Denk and McMahon 2017, Megat, Ray, Tavares-Ferreira, Moy,  
613 Sankaranarayanan, Wangzhou, Fang Lou, Barragan-Iglesias, Campbell, Dussor and Price 2019).

614

### 615 *Different DRG neuronal populations in SCI*

616 Different types of sensory neurons are distinct in their responses to injury. It is likely that, even  
617 within an identified subpopulation, cells will nonetheless exhibit heterogeneity (Hu, Huang, Hu,  
618 Du, Xue, Zhu and Fan 2016). Because injury does not impact all afferents in the same way, we  
619 analyzed gene expression changes within the population of nociceptors projecting to the skin  
620 below the level of injury. By focusing on small nociceptors innervating dermatomes below the  
621 level of injury, we begin to address what unique set of genes within a specific population may be  
622 contributing to the burning, stabbing, and shooting pain reported in SCI patients suffering from  
623 below-level neuropathic pain (Siddall, McClelland, Rutkowski and Cousins 2003). Our goal was  
624 to better understand how SCI affects molecular changes within a specific population of neurons,  
625 and how this may contribute to hypersensitivity following SCI. We focused our analysis on sensory  
626 neurons from lumbar DRGs (below the level of the SCI) projecting to the hairy hindpaw skin  
627 **Fig.2A**). After confirming we had isolated the cell population of interest (**Fig.2B, Fig.3**), we used  
628 RNAseq to identify changes in gene expression. The use of RNA-Seq has clear advantages over  
629 microarrays, since RNA-Seq is not limited to a set of pre-determined transcripts, has a larger  
630 dynamic range of transcript expression, and is highly reproducible (Usoskin, Furlan, Islam, Abdo,  
631 Lonnerberg, Lou, Hjerling-Leffler, Haeggstrom, Kharchenko, Kharchenko, Linnarsson and  
632 Ernfors 2015). By utilizing this technology, we were able to identify transcript changes  
633 undetectable with traditional RT-PCR or microarrays (Wang and Zylka 2009). Our RNAseq data  
634 from naïve, sham, and injured animals display distinct patterns of somatosensory genes present in  
635 this nociceptor-enriched population. In particular, RPKM values show high levels of *Scn10a* (a  
636 marker for nociceptors), purinergic receptor *P2rx3*, *Mrgprd* (markers for the non-peptidergic  
637 population of nociceptors), and *Calca* and *Calcb* (neuropeptide precursors), indicating that we  
638 isolated the desired nociceptor specific cell population, and also indicating important genes within  
639 the population of sensory neurons projecting to the hairy hindpaw skin (**Fig.4A-D**). Multiple gene  
640 transcripts important for itch, tactile function, and proprioception all had relatively low RPKM  
641 values, indicating again that we isolated the desired target cell population, and that injury did not  
642 induce modifications in the type of stimuli nociceptors transduce (**Fig.4C**). Our population level  
643 analysis revealed significant changes after SCI in a number of ion channels and receptors that are  
644 already known to play a role in pain or hypersensitivity, such as *Piezo2*, and transcripts involved

645 in excitatory signaling, such as Grik1 (**Fig.5C, Table 1**). However, there were also many genes  
646 whose expression and functional roles in persistent pain have yet to be characterized, including  
647 Trpc4 and Ttyh1 (**Fig.5A,B, Table 1**).

648

#### 649 *Transcriptome profiling in studies of DRG*

650 Many studies have utilized RNA-seq technology to gain insight into nociceptor transcriptomes  
651 within the DRG and how it changes relative to different pain models (Hu, Huang, Hu, Du, Xue,  
652 Zhu and Fan 2016, Megat, Ray, Tavares-Ferreira, Moy, Sankaranarayanan, Wanghzou, Fang Lou,  
653 Barragan-Iglesias, Campbell, Dussor and Price 2019, Thakur, Crow, Richards, Davey, Levine,  
654 Kelleher, Agle, Denk, Harridge and McMahon 2014, Usoskin, Furlan, Islam, Abdo, Lonnerberg,  
655 Lou, Hjerling-Leffler, Haeggstrom, Kharchenko, Kharchenko, Linnarsson and Ernfors 2015).  
656 Although previous screens have yielded various nociceptor-specific genes, we have identified a  
657 unique pattern of gene expression within a population of nociceptors projecting to the periphery  
658 (**Fig. 6**). By cross-comparing our data set with similar studies, we were able to identify our cells  
659 of interest and confirm that we obtained cell-type specificity. Notably, many of the current  
660 technologies require a transgenic mouse with a cell-type specific reporter. However, by taking  
661 advantage of the anatomical organization of the mouse, we were able to use backlabeling and  
662 FACS sorting in non-transgenic animals to isolate a nociceptor-enriched population with a low  
663 degree of contamination with other cell types. We further implemented this methodology to  
664 identify candidate genes in a specific population of neurons below the level of injury in a model  
665 of SCI to better understand the heterogenous injury response among the many subtypes of DRG  
666 neurons.

667

668 Among these comparisons we observed large fold changes in several genes ((**Fig.7A,B**),  
669 highlighted in red and blue). However, instead of focusing on larger changes in a small subset of  
670 genes with individual functions, we concentrated our analysis on the interaction of many  
671 transcripts that were significantly altered after SCI and how these influenced intracellular signaling  
672 pathways (**Fig.7C**). Ingenuity Pathway Analysis implicated numerous pathways associated with  
673 the progression to persistent pain. We took particular interest in the synaptogenesis signaling  
674 pathway as a key player at this 4 day time point, suggesting a role for synaptic plasticity in the  
675 transition from acute to chronic pain after SCI. In addition to its relevance within our model, many  
676 of the transcripts involved in synaptic plasticity overlapped with several other pathways (**Fig.7C**)  
677 and had RPKM values that could be validated by qPCR (**Fig.7D**). Synaptogenesis is typically  
678 associated with developmental processes, including axon guidance and synapse formation (Klein  
679 2004). However, activation of various signaling pathways involved in synaptogenesis may also  
680 contribute to pain; for example persistent pain is supported via changes in synaptic signaling,  
681 neuronal plasticity, and long term potentiation, and may form memory-like networks for painful  
682 signals that allow persistent pain to occur long after the initial injury (Khangura et al. 2019,  
683 Kobayashi et al. 2007).

684

685 Included in the many of the genes of interest within the synaptogenesis pathway, Ephb2 was  
686 significantly down regulated post-injury (**Table 1**). The gene transcript is part of the Ephrin  
687 tyrosine kinase receptor protein family that is expressed in laminae I-III of the spinal dorsal horn



688 on small and medium sized DRG neurons (presumably nociceptors) (Bundesen et al. 2003). Ephb  
689 receptors regulate synaptic activity in the spinal cord and contribute to persistent pain associated  
690 with NMDA activity (Khangura, Sharma, Bali, Singh and Jaggi 2019). Numerous receptor  
691 tyrosine kinases localize to synapses and contribute to synaptogenesis in addition to EphB  
692 receptors, including Trk receptors (Biederer and Stagi 2008). Ntrk2, the receptor for BDNF, was  
693 highly expressed in this cell population; commensurately, BDNF transcript levels were  
694 significantly upregulated in the injured population (**Table 1**). Camk2g transcript levels were  
695 significantly increased in the SCI population of cutaneous nociceptors as well, and recent work  
696 has shown phosphorylation of Camk2g induces Bdnf mRNA transcription (Yan et al. 2016). This  
697 parallels increasing evidence that neuronal activity (such as increased activity or  
698 hyperexcitability) activates alternative neuronal circuits through activity-regulated genes, such as  
699 *BDNF* (Lu et al. 2009). Many of the genes significantly altered in the synaptogenesis pathway may  
700 function together to generate neuropathic pain (**Suppl.7**).

701

#### 702 *Networks of genes coordinating responses to SCI*

703 Regulatory interrelationships predicted by the IPA program were also examined (**Fig.7E**). Many  
704 of these networks are related to inflammatory signaling mechanisms, suggesting a link between  
705 pro-inflammatory signaling and synaptic transmission (Medelin et al. 2018). Previous work has  
706 associated inflammatory mechanisms to diseases of the CNS, including multiple sclerosis,  
707 Alzheimer's disease, and Parkinson's disease (Medelin, Giacco, Aldinucci, Castronovo, Bonechi,  
708 Sibilla, Tanturli, Torcia, Ballerini, Cozzolino and Ballerini 2018). The mechanisms through which  
709 inflammation prompts changes in synaptic transmission are not fully understood, but several of  
710 the classic pro-inflammatory cytokines (including TNF- $\alpha$ , IL-6, IL-1 $\beta$ ) have been shown to  
711 contribute to a decrease in hippocampal neurogenesis, and could be playing a similar role within  
712 the spinal cord following injury (Kohman and Rhodes 2013). Overall, pro-inflammatory  
713 conditions have been associated with increases in post-synaptic NMDA and AMPA receptors, and  
714 inhibition of GABAergic receptors (Medelin, Giacco, Aldinucci, Castronovo, Bonechi, Sibilla,  
715 Tanturli, Torcia, Ballerini, Cozzolino and Ballerini 2018).

716

#### 717 **Conclusion**

718 Molecular changes typically reflect phenotypic characteristics, and our data show changes in gene  
719 expression 4 days after injury, suggesting that many of these genes may be responsible for the  
720 development of spontaneous activity reported elsewhere (Bedi, Yang, Crook, Du, Wu, Fishman,  
721 Grill, Carlton and Walters 2010, Yang, Wu, Hadden, Odem, Zuo, Crook, Frost and Walters 2014).  
722 We recognize that RNA-Seq of batched neurons elucidated changes in gene targets in a  
723 subpopulation of cells, but averaging occurred when pooling large numbers of cells, precluding  
724 analysis at the level of the single cell (Haque et al. 2017). Further analysis at the single cell level  
725 of cutaneous nociceptors will clarify the contributions of specific subpopulations (non-peptidergic  
726 versus peptidergic) to chronic pain after SCI. Functional studies are also needed to analyze the  
727 roles of this specific cell population, to better understand the connectivity and plasticity of the  
728 CNS and PNS. While our results begin to address prospective gene networks that may contribute  
729 to the development of chronic pain, additional behavioral testing in conjunction with targeting of  
730 specific biological mechanisms until the chronic pain phase is necessary in order to attribute

731 specific transcriptional changes to pain phenotypes. The DRG nociceptor preparation isolated by  
732 backlabeling with WGA-488 and FACS has many applications in molecular studies. We have  
733 demonstrated how the cutaneous nociceptor transcriptome is altered following SCI to gain novel  
734 biological insight into disease mechanisms in a cell-type specific approach. It is evident that the  
735 transition from acute to chronic pain occurs in distinct steps that involve numerous signaling  
736 pathways, providing a host of potential new drug targets.

737

#### 738 **Author Contributions**

739 J.Y. and R.M. designed research; J.Y. performed research; J.Y. and R.M. analyzed data; J.Y., I.M.  
740 and R.M. wrote the paper.

741

#### 742 **Acknowledgments**

743 We thank Dr. Nicholas Wasko and Dr. Robert Clarke for providing us with cuprizone treated mice,  
744 and Dr. Evan Jellison for his help and expertise with flow cytometry. We acknowledge Dr. Bo  
745 Reese and the Center for Genome Innovation, Institute for Systems Genomics, University of  
746 Connecticut for library construction and RNA sequencing services. We also acknowledge Dr.  
747 Vijender Singh and the Computational Biology Core, Institute for Systems Genomics, University  
748 of Connecticut for base-calling, read alignment, and assembly of individual transcripts to align to  
749 the genome. This work was supported by NIH DK032948 (REM) and the University of  
750 Connecticut Graduate School.

751

752 **Conflict of Interest:** The authors declare that they have no conflicts of interest.

753

754 **Data Availability:** The datasets generated during and/ or analyzed during the current study are  
755 available in Gene Expression Omnibus repository under the series record number GSE132552, all  
756 other data generated during this study are included in this published article (and its Supplementary  
757 Information files).

758

#### 759 **Figure Legends:**

760 **Figure 1. Behavioral responses and cytokines.** (A1) Open field behavior (10 minute trials) in  
761 naïve or sham mice 0,1,3,5 and 7 days post-surgery does not differ significantly at any time point  
762 in total ambulation, N=3-10 sham, 4 naïve. (A2) Total ambulation differs significantly 1 day post-  
763 SCI in both SCI vs. naïve (one-way ANOVA,  $p=0.0059$ , Tukey's multiple comparisons test  
764  $**p<0.005$ ) and SCI vs. sham ( $*p<0.05$ ) mice. (B1) Mechanical and (B2) thermal sensitivity do  
765 not differ significantly 0,1,3,5, and 7 days post-surgery in naïve and sham mice, N=6 each. (C)  
766 Cytokine ELISAs on spinal cord segments at the level of laminectomy (T8-T11) show no  
767 significant differences between naïve and sham mice 1 or 4 days post-surgery. 1-day post-  
768 operation, SCI mice have significantly increased levels of IL-6 and IL-10 compared to naïve  
769 controls (one-way ANOVA, Bonferroni's multiple comparisons test;  $*p<0.05$ ,  $**p<0.005$ ,  
770 respectively) and significantly increased levels of IL-10 in comparison to 4d sham condition (one-  
771 way ANOVA, Bonferroni's multiple comparisons test;  $***p<0.001$ ). Cuprizone treated mice as  
772 positive control, with significantly increased TNF- $\alpha$ , IL-1 $\beta$ , and IL-10 compared to naïve controls  
773 (one-way ANOVA, Bonferroni's multiple comparisons test;  $**p<0.005$ ,  $**p<0.005$ ,  $***p<0.001$ ,

774 respectively) after 5 weeks of cuprizone treatment and significant increases in IL-1 $\beta$  at the 1d sham  
775 timepoint, and IL-10 at the 4d sham timepoint (one-way ANOVA, Bonferroni's multiple  
776 comparisons test; \* $p < 0.05$ , \*\*\*\* $p < 0.0001$ , respectively). \* Represents comparisons to naïve  
777 conditions, # represents comparisons to 1d sham conditions, ^ represents comparisons to 4d sham  
778 conditions.

779 **Figure 2. Identifying sensory neurons.** (A) Diagram of WGA-488 injection under the hairy  
780 hindpaw skin of a mouse, how the spinal cord injury was conducted with a vessel clip, and  
781 projections to the corresponding DRG. (B) Fluorescent cell images taken by Amnis  
782 ImageStreamX Mark II imaging flow cytometer (Luminex Co.) using a 60x objective lens with  
783 excitation from a 405nm laser and a 488nm laser to identify propidium iodide (PI; red) positive  
784 (dead) cells and WGA (green) labeled cells, respectively. (C) Sample images of rejected cells  
785 because of attachment to non-nociceptor cells. Similarly, nociceptors with attached PI+ debris  
786 were eliminated.

787 **Figure 3. Isolating sensory neurons.** (A) FACS purification of cultured DRG cells based on  
788 propidium iodide (PI) staining (dead) single cell populations by forward scatter (FSC), single cell  
789 populations by side scatter (SSC), and cells fluorescently labeled with WGA-488 (WGA+). (B)  
790 Contour plot of single WGA+ cells that were sorted directly into lysis buffer for RNA extraction  
791 and color scheme for the gated populations, each condition N=5; ~3000 cells. (C) Representative  
792 image of RIN values run on an Agilent TapeStation before RNAseq.

793 **Figure 4. RNAseq demonstrates specificity of cell isolation.** (A) Average RPKM values from  
794 RNAseq data set from genes that are known to be highly expressed in the cell population of interest  
795 or (B) expected to be expressed in other cell populations outside of the one being studied; larger  
796 myelinated neurons or satellite glial cells, respectively, N=5 per condition. (C) Heatmap of  
797 functional somatosensory mediators within the isolated cell population of interest. Genes were  
798 grouped based on roles established in the literature: thermosensation and nociception, itch, tactile  
799 function, and neurotrophic factors. (D) Heatmap of peptidergic and non-peptidergic markers.  
800 Graph: log<sub>2</sub> of average RPKM values within each condition, RPKM >1, N=5 per condition.

801 **Figure 5. Heatmaps of ion channel transcripts.** (A) Chloride channels, (B) TRP channels, (C)  
802 glutamate ionotropic receptors, (D) GABA ionotropic receptors, (E) potassium channels, (F)  
803 sodium channels, (G) piezo channels. Each family of transcripts includes significant differences  
804 in at least one gene 4 days post-SCI. Channels were clustered based on SCI expression level, and  
805 graphed by the log<sub>2</sub> of average RPKM values within each condition. RPKM <1 were not included,  
806 N=5 per condition.

807 **Figure 6. Expression profiling of differentially sorted isolated DRG.** (A) Heatmap of the top  
808 260 genes from isolated backlabeled cutaneous neurons of the DRG in comparison to similar  
809 studies from publicly available data sets (unsorted dissociated DRG, TRAP-sorted, single cell, or  
810 MACS-sorted dissociated DRGs). Comparisons between conditions were made by unsupervised  
811 hierarchical clustering. (B) Heatmap of the 25 most significantly enriched genes in our data set in  
812 comparison to similar studies from publicly available datasets. Transcripts were graphed by the  
813 log<sub>2</sub> average values within each condition. Datasets that did not express transcripts (RPKM = 0)  
814 are depicted in gray. (C) Heatmap of functional somatosensory mediators within the isolated cell  
815 population of interest in comparison to similar studies from publicly available data sets.

816 Transcripts were graphed by the  $\log_2$  average values within each condition. Datasets that did not  
817 express transcripts (RPKM = 0) are depicted in gray.

818

819 **Table 1. Ion channels and Synaptogenesis.** Average RPKM values that significantly differ 4  
820 days post-SCI. DESeq2 p-Value based on SCI vs. naïve or SCI vs. sham comparisons. P-Values  
821 that are not listed were  $>0.05$ . Transcripts from IPA canonical pathway analysis significantly  
822 different 4 days post-SCI. DESeq2 p-Value based on SCI vs. Naïve or SCI vs. Sham comparisons.

823 **Figure 7. Volcano plots and upstream analysis.** (A,B) DESeq2 significant ( $p>0.05$ ) genes  
824 included in IPA analysis comparing SCI vs. naïve or SCI vs. sham conditions. (C) Significant  
825 ( $p<0.05$ ) overlapping canonical pathways predicted by analyzing genes determined by DESeq2  
826 and outlier cutoff in IPA. (D) Comparisons of RPKM values generated by RNAseq and  $\log_2$   
827 transcript levels (gene-Hprt) validated by qPCR between sham and injured conditions. (E) IPA  
828 network analysis predicted networks based on differentially expressed genes between sham and  
829 SCI conditions. Network analysis also made predictions about the activation state of the transcript  
830 regulator; positive z-score (blue) indicates activation, negative z-score (orange) indicates  
831 inhibition.

832

833 **Table 1:**

| Gene                          | RPKM Naïve | RPKM SCI | RPKM Sham | p-Value<br>SCI vs. N | p-Value<br>SCI vs. Sham |
|-------------------------------|------------|----------|-----------|----------------------|-------------------------|
| <i>Ion Channels</i>           |            |          |           |                      |                         |
| Calcb                         | 86         | 83       | 71        | -                    | 6.5E-03                 |
| Gabrg3                        | 12         | 6        | 17        | 5.3E-04              | 5.7E-04                 |
| Gfra2                         | 219        | 166      | 186       | 1.3E-03              | -                       |
| Gria4                         | 108        | 131      | 119       | 5.0E-02              | 4.5E-02                 |
| Grik1                         | 270        | 196      | 213       | 4.1E-05              | -                       |
| Kcng3                         | 20         | 13       | 18        | 3.3E-03              | 1.3E-02                 |
| Kcnh8                         | 20         | 13       | 18        | -                    | 1.2E-02                 |
| Kcnj11                        | 34         | 30       | 44        | 8.3E-04              | -                       |
| Kcnk1                         | 13         | 7        | 11        | 2.0E-02              | 1.7E-02                 |
| Kcnk13                        | 28         | 19       | 30        | -                    | 2.2E-03                 |
| Kcnk18                        | 19         | 15       | 23        | 3.2E-02              | 1.6E-03                 |
| Kcnn3                         | 21         | 15       | 22        | -                    | 8.8E-03                 |
| Mrgprd                        | 40         | 32       | 51        | 3.7E-07              | -                       |
| Piezo2                        | 143        | 82       | 96        | 1.5E-02              | -                       |
| Scn3a                         | 542        | 447      | 526       | 2.6E-02              | 1.0E-05                 |
| Scn5a                         | 27         | 22       | 34        | -                    | 8.8E-04                 |
| Trpc3                         | 23         | 17       | 34        | 5.2E-04              | -                       |
| Trpc4                         | 104        | 74       | 86        | -                    | 2.3E-03                 |
| Ttyh1                         | 18         | 16       | 25        | -                    | 2.0E-02                 |
| <i>Synaptogenesis Pathway</i> |            |          |           |                      |                         |
| Adcy1                         | 56         | 45       | 83        | -                    | 6.9E-05                 |
| Adcy2                         | 120        | 144      | 140       | 2.9E-02              | -                       |
| Ap2a2                         | 307        | 305      | 260       | -                    | 1.6E-02                 |
| Atf4                          | 154        | 147      | 121       | -                    | 1.3E-02                 |
| Bdnf                          | 57         | 77       | 60        | 1.2E-02              | 3.6E-06                 |
| Cadm1                         | 352        | 304      | 269       | 7.7E-02              | 4.5E-03                 |
| Camk2g                        | 322        | 339      | 278       | -                    | 2.3E-02                 |
| Cdh10                         | 35         | 34       | 46        | -                    | 9.0E-03                 |
| Dlg4                          | 228        | 218      | 200       | -                    | 2.2E-02                 |
| Epha10                        | 9          | 10       | 13        | -                    | 3.3E-02                 |
| Ephb2                         | 11         | 9        | 15        | -                    | 8.4E-04                 |
| Gosr2                         | 102        | 115      | 103       | -                    | 1.0E-02                 |
| Gria4                         | 108        | 131      | 119       | 5.0E-02              | 4.5E-02                 |
| Nap111                        | 210        | 203      | 177       | -                    | 3.1E-02                 |
| Nlgn2                         | 202        | 205      | 185       | -                    | 9.4E-04                 |
| Plcg2                         | 8          | 6        | 12        | -                    | 4.7E-04                 |
| Prkag2                        | 161        | 169      | 147       | -                    | 5.7E-03                 |
| Prkar2b                       | 182        | 153      | 147       | 1.5E-02              | -                       |
| Rap2b                         | 11         | 19       | 20        | 4.0E-03              | -                       |
| Rasgrp1                       | 364        | 286      | 303       | 8.1E-03              | -                       |
| Rras                          | 68         | 67       | 57        | -                    | 1.6E-02                 |
| Rras2                         | 19         | 26       | 26        | 3.1E-02              | -                       |
| Stxbp2                        | 48         | 60       | 50        | 3.8E-02              | 3.0E-02                 |
| Syn3                          | 28         | 27       | 37        | -                    | 4.0E-03                 |
| Syt4                          | 235        | 231      | 197       | -                    | 1.1E-02                 |

834

835

836  
837  
838  
839  
840  
841  
842  
843  
844  
845  
846  
847  
848  
849  
850  
851  
852  
853  
854  
855  
856  
857  
858  
859  
860  
861  
862  
863  
864  
865  
866  
867  
868  
869  
870  
871  
872  
873  
874  
875  
876  
877  
878  
879  
880  
881  
882  
883  
884  
885

## References

- Baek A, Cho SR, Kim SH. 2017. Elucidation of Gene Expression Patterns in the Brain after Spinal Cord Injury. *Cell Transplant*. Jul;26:1286-1300.
- Bannon AW, Malmberg AB. 2007. Models of nociception: hot-plate, tail-flick, and formalin tests in rodents. *Curr Protoc Neurosci*. Oct;Chapter 8:Unit 8 9.
- Basbaum AI, Bautista DM, Scherrer G, Julius D. 2009. Cellular and molecular mechanisms of pain. *Cell*. Oct 16;139:267-284.
- Bedi SS, Yang Q, Crook RJ, Du J, Wu Z, Fishman HM, Grill RJ, Carlton SM, Walters ET. 2010. Chronic spontaneous activity generated in the somata of primary nociceptors is associated with pain-related behavior after spinal cord injury. *J Neurosci*. Nov 3;30:14870-14882.
- Berta T, Perrin FE, Pertin M, Tonello R, Liu YC, Chamesian A, Kato AC, Ji RR, Decosterd I. 2017. Gene Expression Profiling of Cutaneous Injured and Non-Injured Nociceptors in SNI Animal Model of Neuropathic Pain. *Sci Rep*. Aug 24;7:9367.
- Biederer T, Stagi M. 2008. Signaling by synaptogenic molecules. *Curr Opin Neurobiol*. Jun;18:261-269.
- Bruce JC, Oatway MA, Weaver LC. 2002. Chronic pain after clip-compression injury of the rat spinal cord. *Exp Neurol*. Nov;178:33-48.
- Bundesen LQ, Scheel TA, Bregman BS, Kromer LF. 2003. Ephrin-B2 and EphB2 regulation of astrocyte-meningeal fibroblast interactions in response to spinal cord lesions in adult rats. *J Neurosci*. Aug 27;23:7789-7800.
- Campbell JN, Raja SN, Meyer RA, Mackinnon SE. 1988. Myelinated afferents signal the hyperalgesia associated with nerve injury. *Pain*. Jan;32:89-94.
- Cardenas DD, Bryce TN, Shem K, Richards JS, Elhefni H. 2004. Gender and minority differences in the pain experience of people with spinal cord injury. *Arch Phys Med Rehabil*. Nov;85:1774-1781.
- Carlton SM, Du J, Tan HY, Nesic O, Hargett GL, Bopp AC, Yamani A, Lin Q, Willis WD, Hulsebosch CE. 2009. Peripheral and central sensitization in remote spinal cord regions contribute to central neuropathic pain after spinal cord injury. *Pain*. Dec 15;147:265-276.
- Chiu IM, Barrett LB, Williams EK, Strohlic DE, Lee S, Weyer AD, Lou S, Bryman GS, Roberson DP, Ghasemlou N, et al. 2014. Transcriptional profiling at whole population and single cell levels reveals somatosensory neuron molecular diversity. *Elife*. Dec 19;3.
- Citri A, Pang ZP, Sudhof TC, Wernig M, Malenka RC. 2011. Comprehensive qPCR profiling of gene expression in single neuronal cells. *Nat Protoc*. Dec 22;7:118-127.
- Conesa A, Madrigal P, Tarazona S, Gomez-Cabrero D, Cervera A, McPherson A, Szczesniak MW, Gaffney DJ, Elo LL, Zhang X, et al. 2016. A survey of best practices for RNA-seq data analysis. *Genome Biol*. Jan 26;17:13.
- Cook AD, Christensen AD, Tewari D, McMahon SB, Hamilton JA. 2018. Immune Cytokines and Their Receptors in Inflammatory Pain. *Trends Immunol*. Mar;39:240-255.
- da Silva Serra I, Husson Z, Bartlett JD, Smith ES. 2016. Characterization of cutaneous and articular sensory neurons. *Mol Pain*.12.
- de Hoon MJ, Imoto S, Nolan J, Miyano S. 2004. Open source clustering software. *Bioinformatics*. Jun;20:1453-1454. Epub 2004/02/10.
- De Jongh RF, Vissers KC, Meert TF, Booij LH, De Deyne CS, Heylen RJ. 2003. The role of interleukin-6 in nociception and pain. *Anesth Analg*. Apr;96:1096-1103.
- Defrin R, Ohry A, Blumen N, Urca G. 2001. Characterization of chronic pain and somatosensory function in spinal cord injury subjects. *Pain*. Jan;89:253-263.
- Deng X, Wang D, Wang S, Wang H, Zhou H. 2018. Identification of key genes and pathways involved in response to pain in goat and sheep by transcriptome sequencing. *Biol Res*. Aug 17;51:25.

- 886 Devor M. 2006. Sodium channels and mechanisms of neuropathic pain. *J Pain*. Jan;7:S3-S12.
- 887 Dixon WJ. 1980. Efficient analysis of experimental observations. *Annu Rev Pharmacol*
- 888 *Toxicol*.20:441-462.
- 889 Djouhri L, Dawbarn D, Robertson A, Newton R, Lawson SN. 2001. Time course and nerve
- 890 growth factor dependence of inflammation-induced alterations in electrophysiological membrane
- 891 properties in nociceptive primary afferent neurons. *J Neurosci*. Nov 15;21:8722-8733.
- 892 Dominguez E, Rivat C, Pommier B, Mauborgne A, Pohl M. 2008. JAK/STAT3 pathway is
- 893 activated in spinal cord microglia after peripheral nerve injury and contributes to neuropathic
- 894 pain development in rat. *J Neurochem*. Oct;107:50-60.
- 895 Donnelly DJ, Popovich PG. 2008. Inflammation and its role in neuroprotection, axonal
- 896 regeneration and functional recovery after spinal cord injury. *Exp Neurol*. Feb;209:378-388.
- 897 Dubner R, Ruda MA. 1992. Activity-dependent neuronal plasticity following tissue injury and
- 898 inflammation. *Trends Neurosci*. Mar;15:96-103.
- 899 Eijkelkamp N, Linley JE, Torres JM, Bee L, Dickenson AH, Gringhuis M, Minett MS, Hong GS,
- 900 Lee E, Oh U, et al. 2013. A role for Piezo2 in EPAC1-dependent mechanical allodynia. *Nat*
- 901 *Commun*.4:1682.
- 902 Finnerup NB, Johannesen IL, Sindrup SH, Bach FW, Jensen TS. 2001. Pain and dysesthesia in
- 903 patients with spinal cord injury: A postal survey. *Spinal Cord*. May;39:256-262.
- 904 Gaudet AD, Ayala MT, Schleicher WE, Smith EJ, Bateman EM, Maier SF, Watkins LR. 2017.
- 905 Exploring acute-to-chronic neuropathic pain in rats after contusion spinal cord injury. *Exp*
- 906 *Neurol*. Sep;295:46-54.
- 907 Gold MS, Gebhart GF. 2010. Nociceptor sensitization in pain pathogenesis. *Nat Med*.
- 908 Nov;16:1248-1257.
- 909 Goswami SC, Mishra SK, Maric D, Kaszas K, Gonnella GL, Clokie SJ, Kominsky HD, Gross
- 910 JR, Keller JM, Mannes AJ, et al. 2014. Molecular signatures of mouse TRPV1-lineage neurons
- 911 revealed by RNA-Seq transcriptome analysis. *J Pain*. Dec;15:1338-1359.
- 912 Guptarak J, Wanchoo S, Durham-Lee J, Wu Y, Zivadinovic D, Paulucci-Holthausen A, Nestic O.
- 913 2013. Inhibition of IL-6 signaling: A novel therapeutic approach to treating spinal cord injury
- 914 pain. *Pain*. Jul;154:1115-1128.
- 915 Haque A, Engel J, Teichmann SA, Lonnberg T. 2017. A practical guide to single-cell RNA-
- 916 sequencing for biomedical research and clinical applications. *Genome Med*. Aug 18;9:75.
- 917 Harriott AM, Gold MS. 2009. Contribution of primary afferent channels to neuropathic pain.
- 918 *Curr Pain Headache Rep*. Jun;13:197-207.
- 919 Harris JA. 1998. Using c-fos as a neural marker of pain. *Brain Res Bull*.45:1-8.
- 920 Hu G, Huang K, Hu Y, Du G, Xue Z, Zhu X, Fan G. 2016. Single-cell RNA-seq reveals distinct
- 921 injury responses in different types of DRG sensory neurons. *Sci Rep*. Aug 25;6:31851.
- 922 Huang LY, Gu Y, Chen Y. 2013. Communication between neuronal somata and satellite glial
- 923 cells in sensory ganglia. *Glia*. Oct;61:1571-1581.
- 924 Huang WL, Robson D, Liu MC, King VR, Averill S, Shortland PJ, Priestley JV. 2006. Spinal
- 925 cord compression and dorsal root injury cause up-regulation of activating transcription factor-3
- 926 in large-diameter dorsal root ganglion neurons. *Eur J Neurosci*. Jan;23:273-278.
- 927 Joshi M, Fehlings MG. 2002. Development and characterization of a novel, graded model of clip
- 928 compressive spinal cord injury in the mouse: Part 1. Clip design, behavioral outcomes, and
- 929 histopathology. *J Neurotrauma*. Feb;19:175-190.
- 930 Julius D, Basbaum AI. 2001. Molecular mechanisms of nociception. *Nature*. Sep 13;413:203-
- 931 210.
- 932 Khangura RK, Sharma J, Bali A, Singh N, Jaggi AS. 2019. An integrated review on new targets
- 933 in the treatment of neuropathic pain. *Korean J Physiol Pharmacol*. Jan;23:1-20.
- 934 Klein R. 2004. Eph/ephrin signaling in morphogenesis, neural development and plasticity. *Curr*
- 935 *Opin Cell Biol*. Oct;16:580-589.

- 936 Klenke S, Renckhoff K, Engler A, Peters J, Frey UH. 2016. Easy-to-use strategy for reference  
937 gene selection in quantitative real-time PCR experiments. *Naunyn Schmiedebergs Arch*  
938 *Pharmacol. Dec*;389:1353-1366.
- 939 Kobayashi H, Kitamura T, Sekiguchi M, Homma MK, Kabuyama Y, Konno S, Kikuchi S,  
940 Homma Y. 2007. Involvement of EphB1 receptor/EphrinB2 ligand in neuropathic pain. *Spine*  
941 (Phila Pa 1976). Jul 1;32:1592-1598.
- 942 Kohman RA, Rhodes JS. 2013. Neurogenesis, inflammation and behavior. *Brain Behav Immun.*  
943 Jan;27:22-32. Epub 2012/09/15.
- 944 Kramer JL, Minhas NK, Jutzeler CR, Erskine EL, Liu LJ, Ramer MS. 2017. Neuropathic pain  
945 following traumatic spinal cord injury: Models, measurement, and mechanisms. *J Neurosci Res.*  
946 Jun;95:1295-1306.
- 947 Krames ES. 2014. The role of the dorsal root ganglion in the development of neuropathic pain.  
948 *Pain Med.* Oct;15:1669-1685.
- 949 Labaj PP, Kreil DP. 2016. Sensitivity, specificity, and reproducibility of RNA-Seq differential  
950 expression calls. *Biol Direct.* Dec 20;11:66.
- 951 Le Pichon CE, Chesler AT. 2014. The functional and anatomical dissection of somatosensory  
952 subpopulations using mouse genetics. *Front Neuroanat.*8:21.
- 953 Lima L, Gaiteiro C, Peixoto A, Soares J, Neves M, Santos LL, Ferreira JA. 2016. Reference  
954 Genes for Addressing Gene Expression of Bladder Cancer Cell Models under Hypoxia: A Step  
955 Towards Transcriptomic Studies. *PLoS One.*11:e0166120.
- 956 Lopes DM, Denk F, McMahon SB. 2017. The Molecular Fingerprint of Dorsal Root and  
957 Trigeminal Ganglion Neurons. *Front Mol Neurosci.*10:304. Epub 2017/09/26.
- 958 Love MI, Huber W, Anders S. 2014. Moderated estimation of fold change and dispersion for  
959 RNA-seq data with DESeq2. *Genome Biol.*15:550.
- 960 Lu B, Wang KH, Nose A. 2009. Molecular mechanisms underlying neural circuit formation.  
961 *Curr Opin Neurobiol.* Apr;19:162-167.
- 962 Ma M, Basso DM, Walters P, Stokes BT, Jakeman LB. 2001. Behavioral and histological  
963 outcomes following graded spinal cord contusion injury in the C57Bl/6 mouse. *Exp Neurol.*  
964 Jun;169:239-254.
- 965 Mains RE, Blaby-Haas C, Rheume BA, Eipper BA. 2018. Changes in Corticotrope Gene  
966 Expression Upon Increased Expression of Peptidylglycine alpha-Amidating Monooxygenase.  
967 *Endocrinology.* Jul 1;159:2621-2639.
- 968 Malin SA, Davis BM, Molliver DC. 2007. Production of dissociated sensory neuron cultures and  
969 considerations for their use in studying neuronal function and plasticity. *Nat Protoc.*2:152-160.
- 970 Marques SA, de Almeida FM, Mostacada K, Martinez AM. 2014. A highly reproducible mouse  
971 model of compression spinal cord injury. *Methods Mol Biol.*1162:149-156.
- 972 Medelin M, Giacco V, Aldinucci A, Castronovo G, Bonechi E, Sibilla A, Tanturli M, Torcia M,  
973 Ballerini L, Cozzolino F, et al. 2018. Bridging pro-inflammatory signals, synaptic transmission  
974 and protection in spinal explants in vitro. *Mol Brain.* 01;11:3. Epub 2018/01/15.
- 975 Megat S, Ray PR, Tavares-Ferreira D, Moy JK, Sankaranarayanan I, Wangzhou A, Fang Lou T,  
976 Barragan-Iglesias P, Campbell ZT, Dussor G, et al. 2019. Differences between dorsal root and  
977 trigeminal ganglion nociceptors in mice revealed by translational profiling. *J Neurosci.* Jun.  
978 Epub 2019/06/28.
- 979 Meisner JG, Marsh AD, Marsh DR. 2010. Loss of GABAergic interneurons in laminae I-III of  
980 the spinal cord dorsal horn contributes to reduced GABAergic tone and neuropathic pain after  
981 spinal cord injury. *J Neurotrauma.* Apr;27:729-737.
- 982 Mukhamedshina YO, Akhmetzyanova ER, Martynova EV, Khaiboullina SF, Galieva LR,  
983 Rizvanov AA. 2017. Systemic and Local Cytokine Profile following Spinal Cord Injury in Rats:  
984 A Multiplex Analysis. *Front Neurol.*8:581.



- 985 Nakae A, Nakai K, Yano K, Hosokawa K, Shibata M, Mashimo T. 2011. The animal model of  
986 spinal cord injury as an experimental pain model. *J Biomed Biotechnol.*2011:939023.
- 987 Naranjo JR, Mellstrom B, Achaval M, Sassone-Corsi P. 1991. Molecular pathways of pain:  
988 Fos/Jun-mediated activation of a noncanonical AP-1 site in the prodynorphin gene. *Neuron.*  
989 *Apr*;6:607-617.
- 990 Nees TA, Tappe-Theodor A, Sliwinski C, Motsch M, Rupp R, Kuner R, Weidner N, Blesch A.  
991 2016. Early-onset treadmill training reduces mechanical allodynia and modulates calcitonin  
992 gene-related peptide fiber density in lamina III/IV in a mouse model of spinal cord contusion  
993 injury. *Pain.* *Mar*;157:687-697.
- 994 Ramabadrán K, Bansinath M, Turndorf H, Puig MM. 1989. Tail immersion test for the  
995 evaluation of a nociceptive reaction in mice. Methodological considerations. *J Pharmacol*  
996 *Methods.* *Mar*;21:21-31.
- 997 Ritter DM, Zemel BM, Lepore AC, Covarrubias M. 2015. Kv3.4 channel function and  
998 dysfunction in nociceptors. *Channels (Austin).*9:209-217. Epub 2015/06/03.
- 999 Schmitz T, Chew LJ. 2008. Cytokines and myelination in the central nervous system.  
1000 *ScientificWorldJournal.* *Nov* 2;8:1119-1147.
- 1001 Shiao R, Lee-Kubli CA. 2018. Neuropathic Pain After Spinal Cord Injury: Challenges and  
1002 Research Perspectives. *Neurotherapeutics.* *May* 7;15:635-653.
- 1003 Siddall PJ, Loeser JD. 2001. Pain following spinal cord injury. *Spinal Cord.* *Feb*;39:63-73.
- 1004 Siddall PJ, McClelland JM, Rutkowski SB, Cousins MJ. 2003. A longitudinal study of the  
1005 prevalence and characteristics of pain in the first 5 years following spinal cord injury. *Pain.*  
1006 *Jun*;103:249-257.
- 1007 Suzuki K, Kikkawa Y. 1969. Status spongiosus of CNS and hepatic changes induced by  
1008 cuprizone (biscyclohexanone oxalyldihydrazone). *Am J Pathol.* *Feb*;54:307-325.
- 1009 Szczot M, Liljencrantz J, Ghitani N, Barik A, Lam R, Thompson JH, Bharucha-Goebel D, Saade  
1010 D, Necaie A, Donkervoort S, et al. 2018. PIEZO2 mediates injury-induced tactile pain in mice  
1011 and humans. *Sci Transl Med.* *Oct* 10;10.
- 1012 Tator CHaP, P. . 2008. *Animal Models of Acute Neurological Injuries.* J Chen editor New York,  
1013 Totowa, NJ.
- 1014 Thakur M, Crow M, Richards N, Davey GI, Levine E, Kelleher JH, Agley CC, Denk F, Harridge  
1015 SD, McMahon SB. 2014. Defining the nociceptor transcriptome. *Front Mol Neurosci.*7:87.
- 1016 Tsuda M, Kohro Y, Yano T, Tsujikawa T, Kitano J, Tozaki-Saitoh H, Koyanagi S, Ohdo S, Ji  
1017 RR, Salter MW, et al. 2011. JAK-STAT3 pathway regulates spinal astrocyte proliferation and  
1018 neuropathic pain maintenance in rats. *Brain.* *Apr*;134:1127-1139.
- 1019 Usoskin D, Furlan A, Islam S, Abdo H, Lonnerberg P, Lou D, Hjerling-Leffler J, Haeggstrom J,  
1020 Kharchenko O, Kharchenko PV, et al. 2015. Unbiased classification of sensory neuron types by  
1021 large-scale single-cell RNA sequencing. *Nat Neurosci.* *Jan*;18:145-153.
- 1022 Walters ET. 2012. Nociceptors as chronic drivers of pain and hyperreflexia after spinal cord  
1023 injury: an adaptive-maladaptive hyperfunctional state hypothesis. *Front Physiol.*3:309.
- 1024 Walters ET. 2018. How is chronic pain related to sympathetic dysfunction and autonomic  
1025 dysreflexia following spinal cord injury? *Auton Neurosci.* *Jan*;209:79-89.
- 1026 Wang H, Zylka MJ. 2009. Mrgprd-expressing polymodal nociceptive neurons innervate most  
1027 known classes of substantia gelatinosa neurons. *J Neurosci.* *Oct* 21;29:13202-13209.
- 1028 Wasko NJ, Kulak MH, Paul D, Nicaise AM, Yeung ST, Nichols FC, Khanna KM, Crocker S,  
1029 Pachter JS, Clark RB. 2019. Systemic TLR2 tolerance enhances central nervous system  
1030 remyelination. *J Neuroinflammation.* *Jul*;16:158. Epub 2019/07/27.
- 1031 Waxman SG, Dib-Hajj S, Cummins TR, Black JA. 1999. Sodium channels and pain. *Proc Natl*  
1032 *Acad Sci U S A.* *Jul* 6;96:7635-7639.
- 1033 Wickenden A. 2002. K (+) channels as therapeutic drug targets. *Pharmacol Ther.* *Apr-*  
1034 *May*;94:157-182.

- 1035 Woolf CJ. 2011. Central sensitization: implications for the diagnosis and treatment of pain. *Pain*.  
1036 Mar;152:S2-15.
- 1037 Wu G, Ringkamp M, Hartke TV, Murinson BB, Campbell JN, Griffin JW, Meyer RA. 2001.  
1038 Early onset of spontaneous activity in uninjured C-fiber nociceptors after injury to neighboring  
1039 nerve fibers. *J Neurosci*. Apr 15;21:RC140.
- 1040 Wu Z, Wu H. 2016. Experimental Design and Power Calculation for RNA-seq Experiments.  
1041 *Methods Mol Biol*.1418:379-390.
- 1042 Wu Z, Yang Q, Crook RJ, O'Neil RG, Walters ET. 2013. TRPV1 channels make major  
1043 contributions to behavioral hypersensitivity and spontaneous activity in nociceptors after spinal  
1044 cord injury. *Pain*. Oct;154:2130-2141.
- 1045 Xia M, Liu D, Yao C. 2015. TRPC3: A New Target for Therapeutic Strategies in Chronic Pain-  
1046 DAG-mediated Activation of Non-selective Cation Currents and Chronic Pain (*Mol Pain*  
1047 2014;10:43). *J Neurogastroenterol Motil*. Jul 30;21:445-447.
- 1048 Xie W, Strong JA, Meij JT, Zhang JM, Yu L. 2005. Neuropathic pain: early spontaneous afferent  
1049 activity is the trigger. *Pain*. Aug;116:243-256.
- 1050 Xue ZJ, Shen L, Wang ZY, Hui SY, Huang YG, Ma C. 2014. STAT3 inhibitor WP1066 as a  
1051 novel therapeutic agent for bCCI neuropathic pain rats. *Brain Res*. Oct 2;1583:79-88.
- 1052 Yan X, Liu J, Ye Z, Huang J, He F, Xiao W, Hu X, Luo Z. 2016. CaMKII-Mediated CREB  
1053 Phosphorylation Is Involved in Ca<sup>2+</sup>-Induced BDNF mRNA Transcription and Neurite  
1054 Outgrowth Promoted by Electrical Stimulation. *PLoS One*.11:e0162784.
- 1055 Yang Q, Wu Z, Hadden JK, Odem MA, Zuo Y, Crook RJ, Frost JA, Walters ET. 2014. Persistent  
1056 pain after spinal cord injury is maintained by primary afferent activity. *J Neurosci*. Aug  
1057 6;34:10765-10769.
- 1058 Yeziarski RP. 2005. Spinal cord injury: a model of central neuropathic pain.  
1059 *Neurosignals*.14:182-193.
- 1060 You HJ, Colpaert FC, Arendt-Nielsen L. 2008. Long-lasting descending and transitory short-  
1061 term spinal controls on deep spinal dorsal horn nociceptive-specific neurons in response to  
1062 persistent nociception. *Brain Res Bull*. Jan 31;75:34-41.
- 1063 Zhang D, Mou JY, Wang F, Liu J, Hu X. 2019. CRNDE enhances neuropathic pain via  
1064 modulating miR-136/IL6R axis in CCI rat models. *J Cell Physiol*. May. Epub 2019/05/26.
- 1065 Zhou Q, Bao Y, Zhang X, Zeng L, Wang L, Wang J, Jiang W. 2014. Optimal interval for hot  
1066 water immersion tail-flick test in rats. *Acta Neuropsychiatr*. Aug;26:218-222.
- 1067

**Fig.1**

□ Naive    ■ Sham    ■ SCI

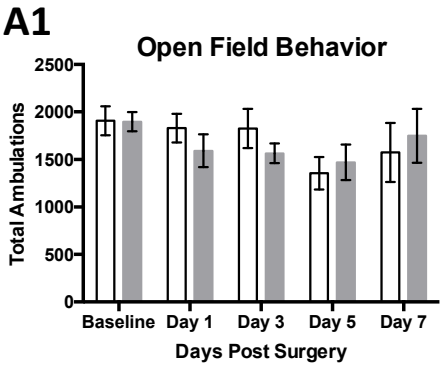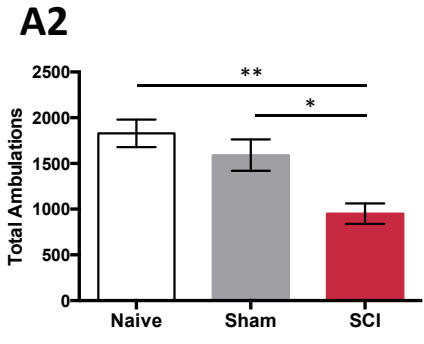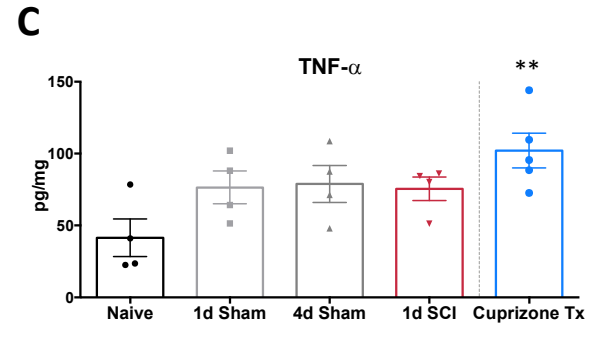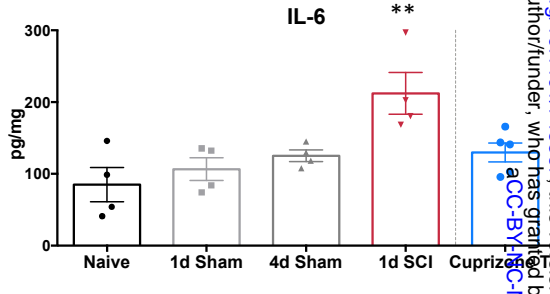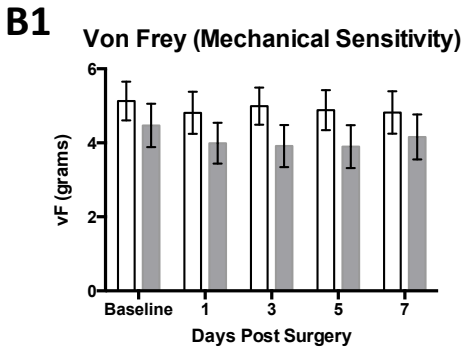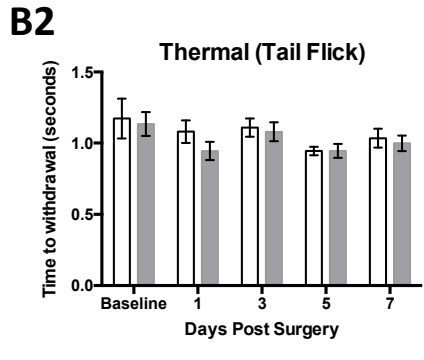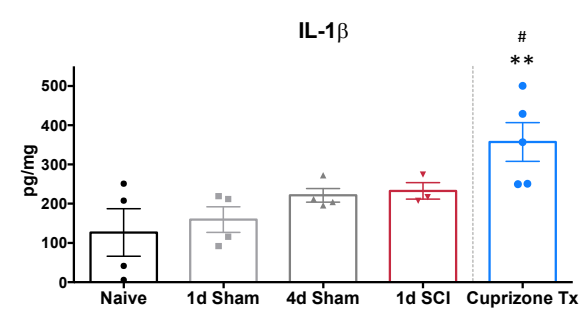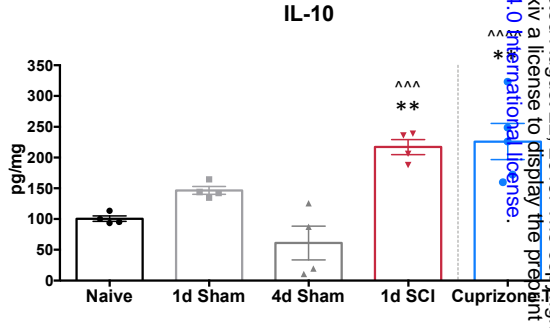

**Fig.2**

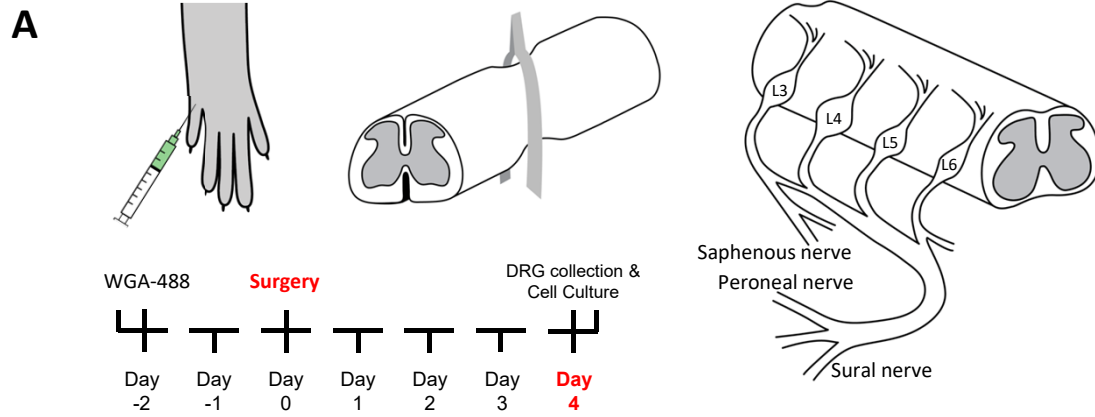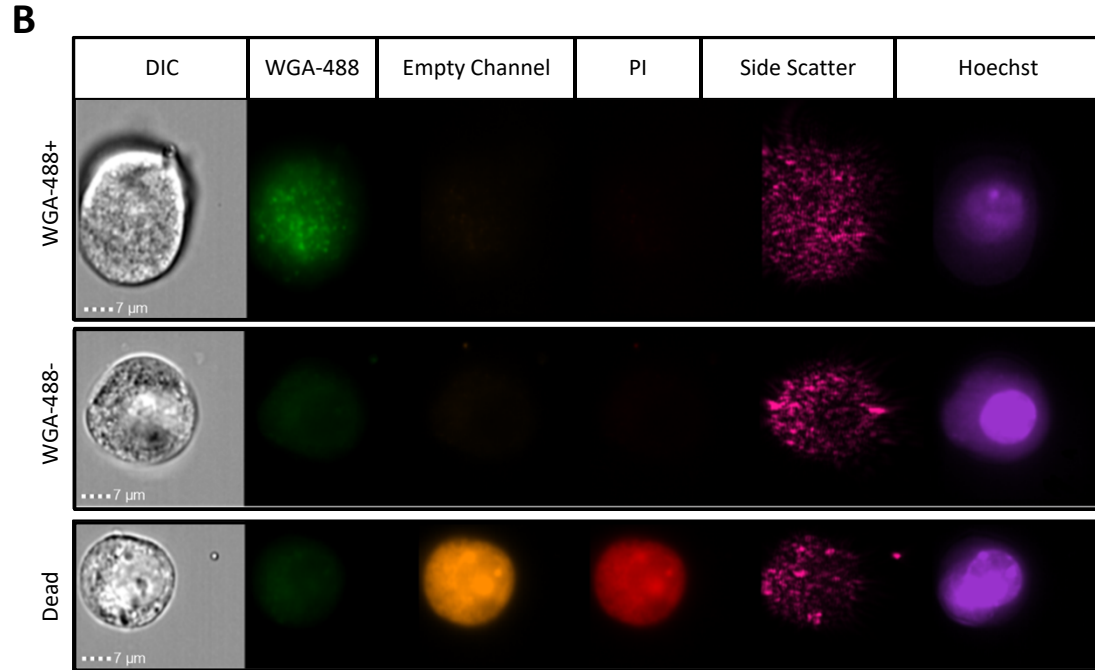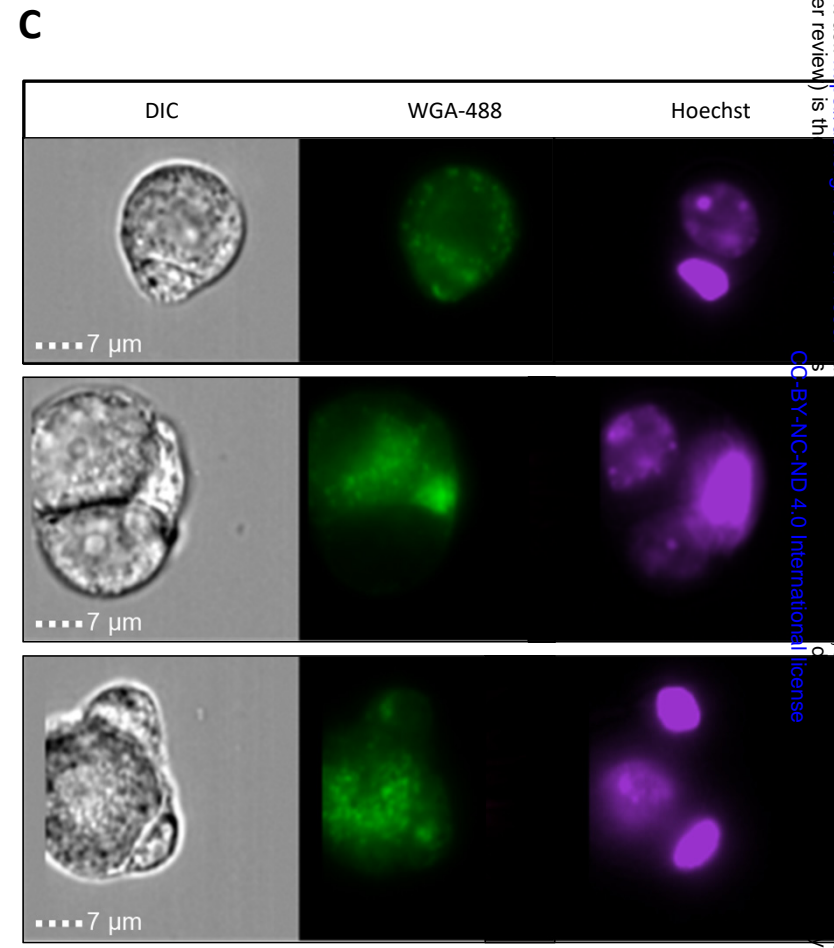

Fig.3

A

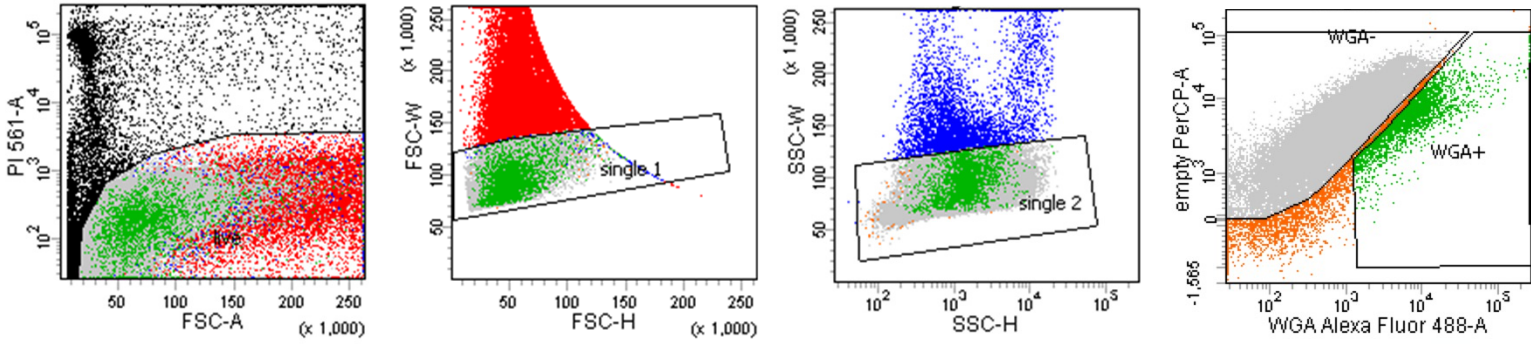

B

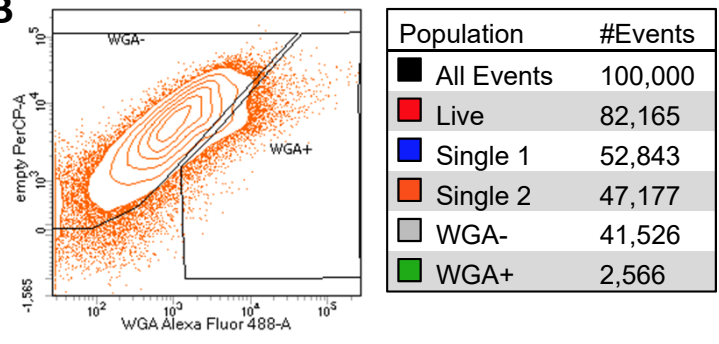

C

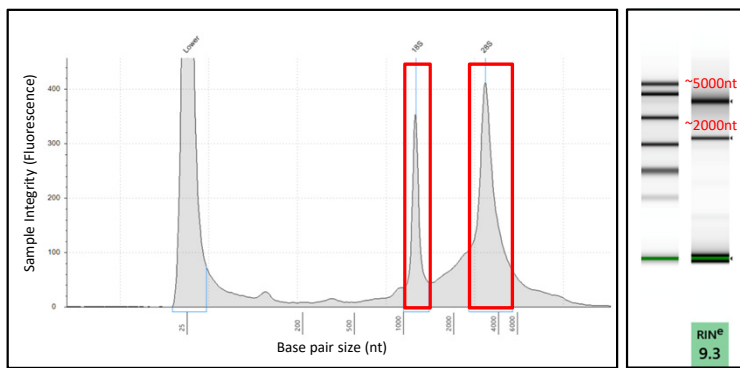

Fig.4

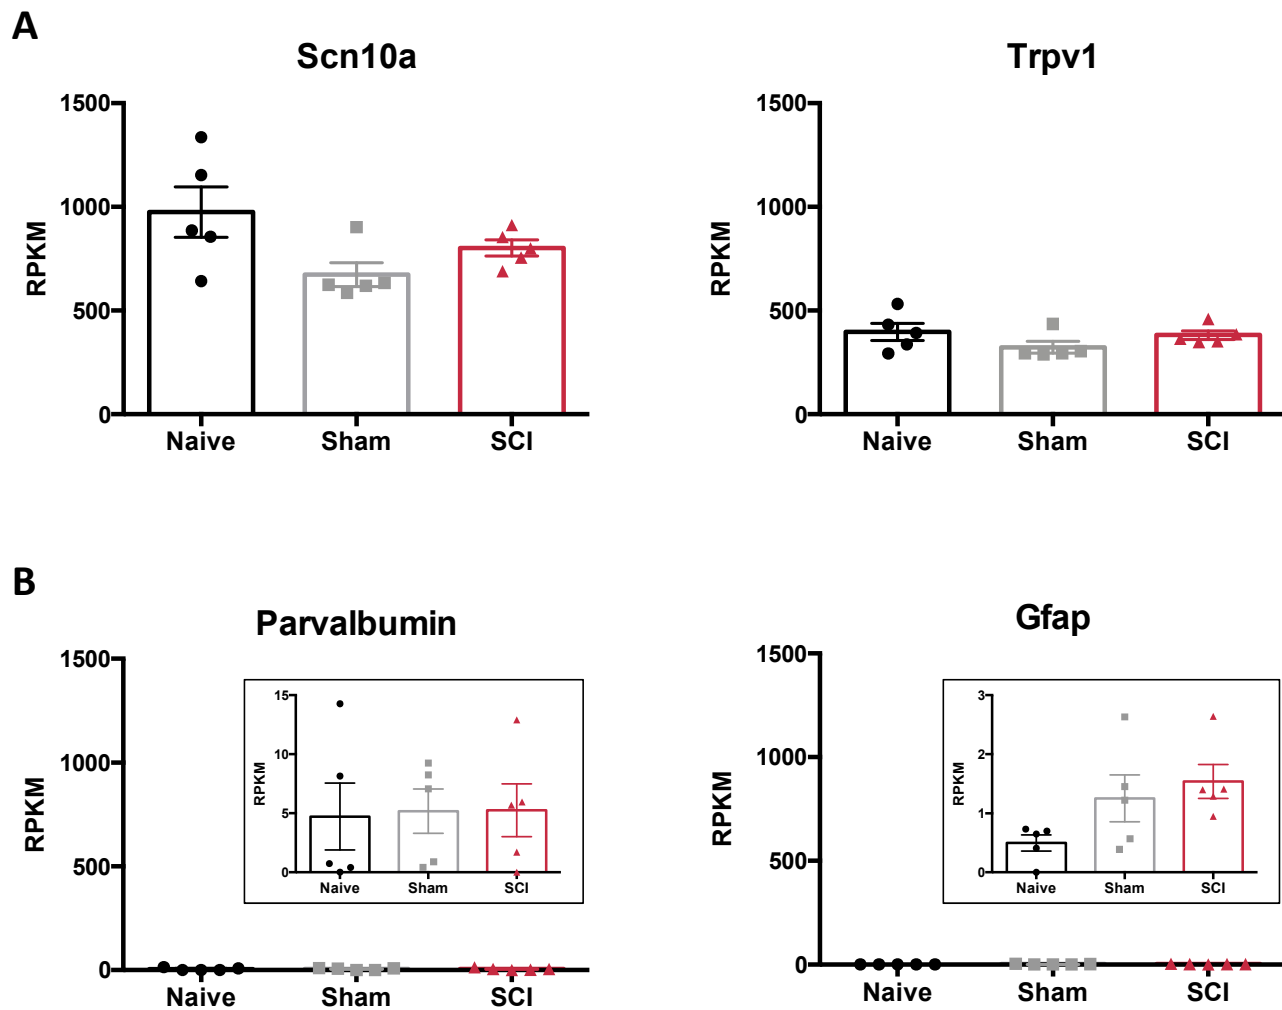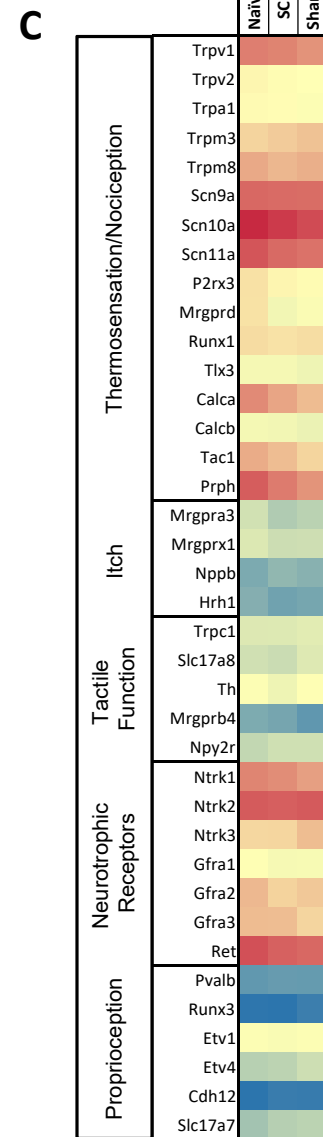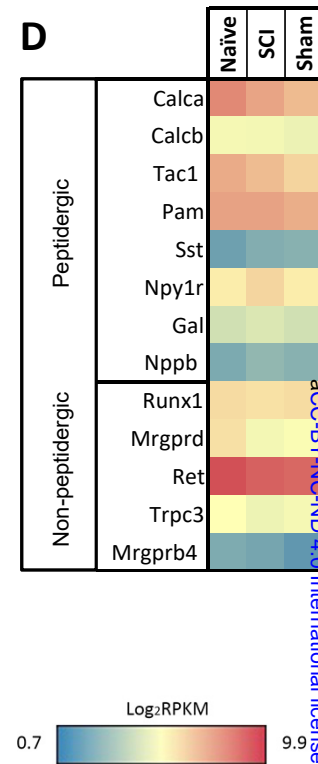

**Fig.5**

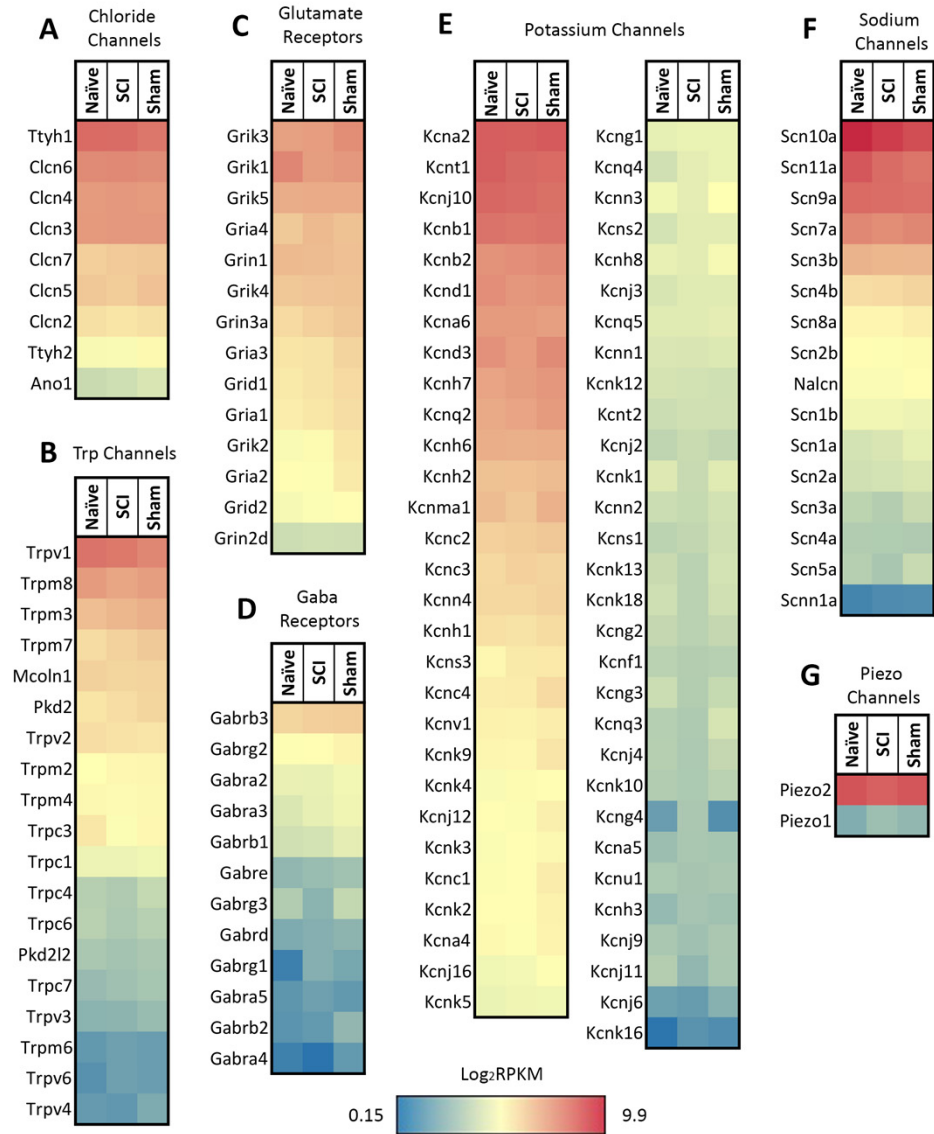

**Fig.6**

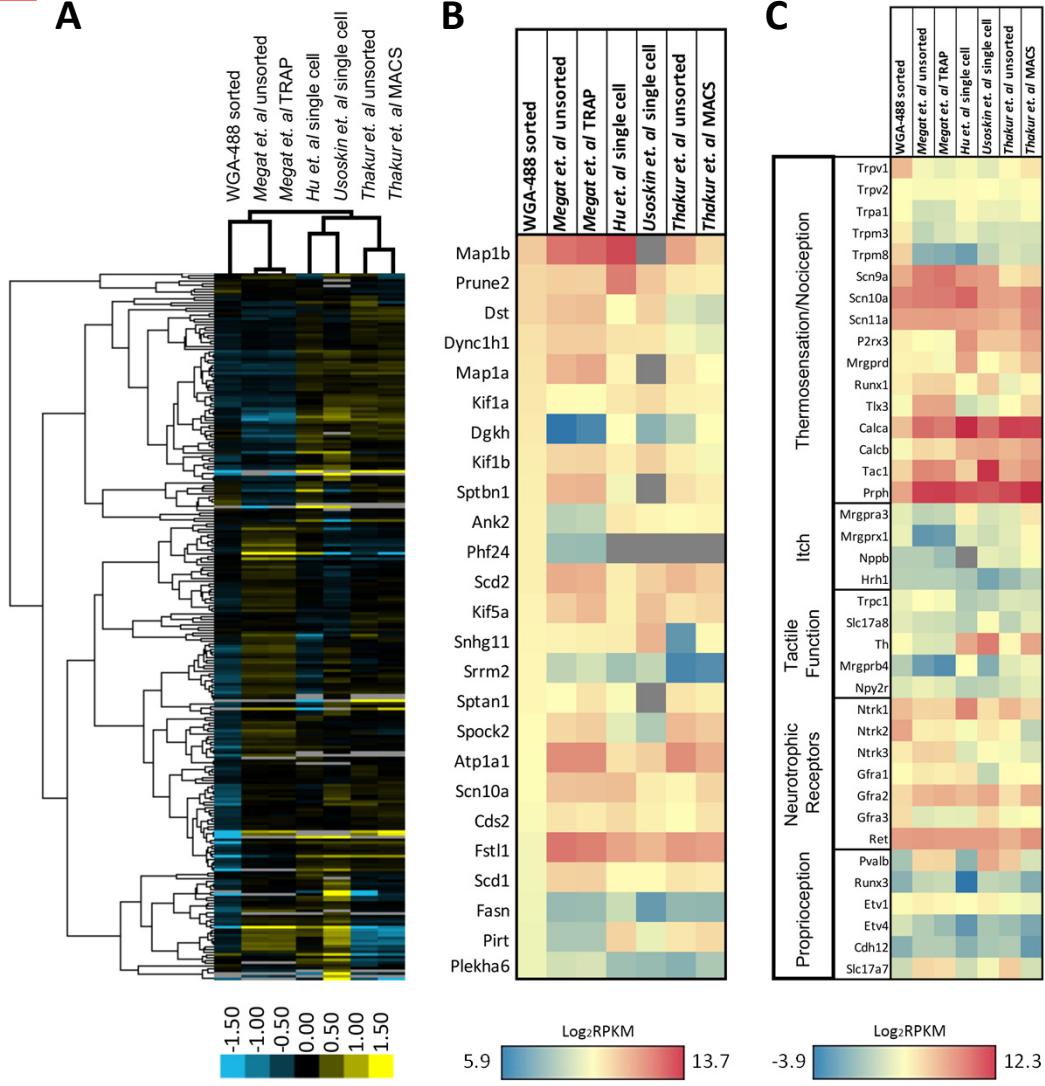



Fig.7

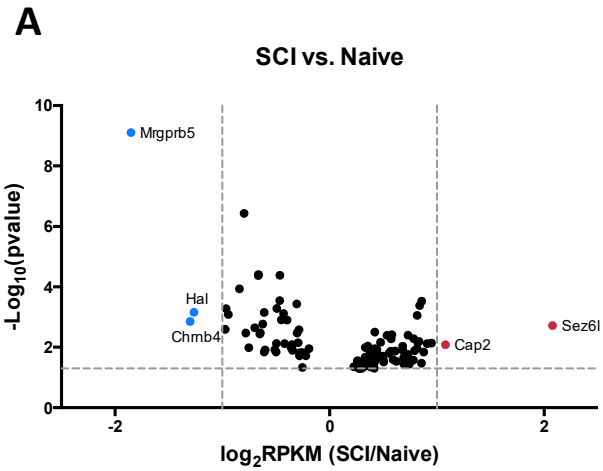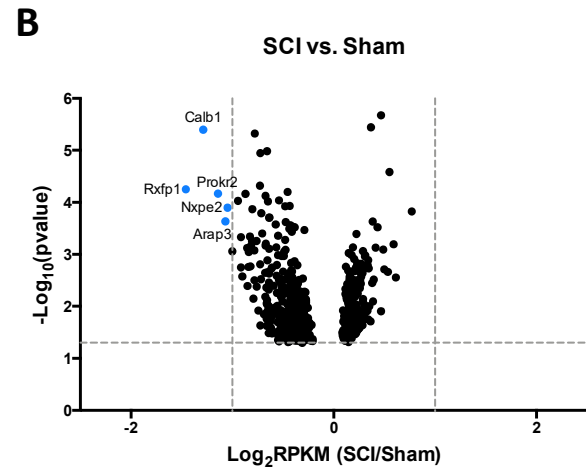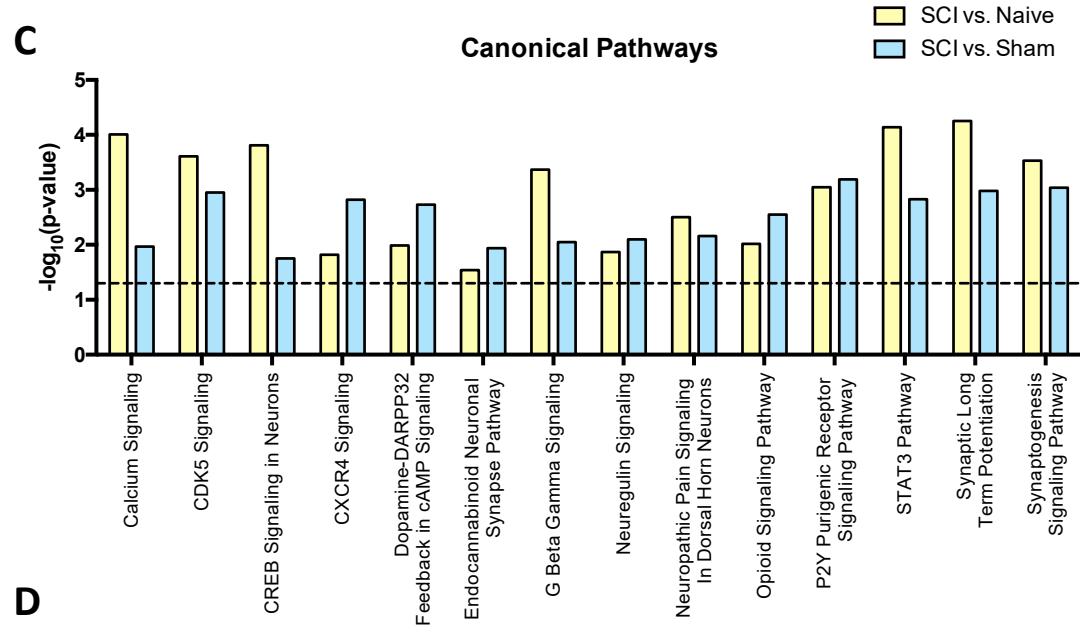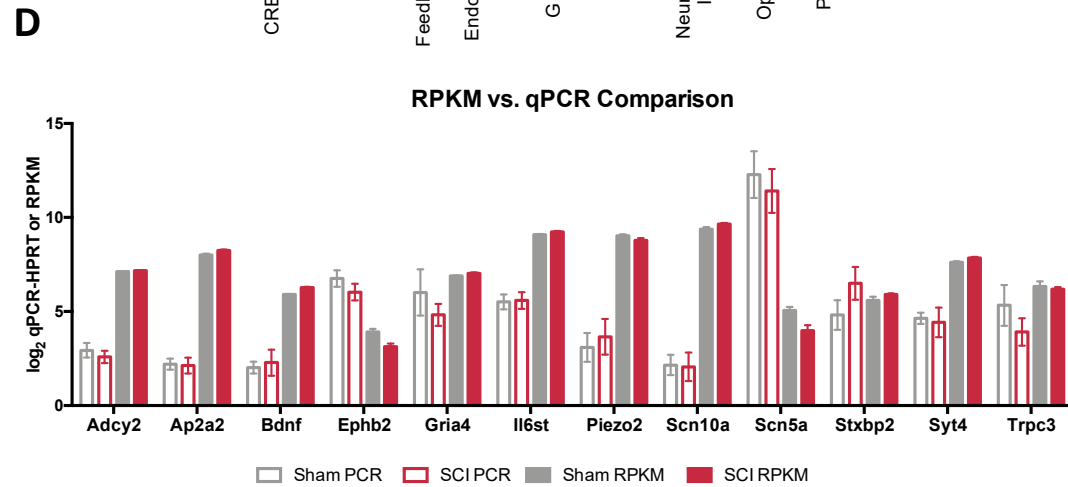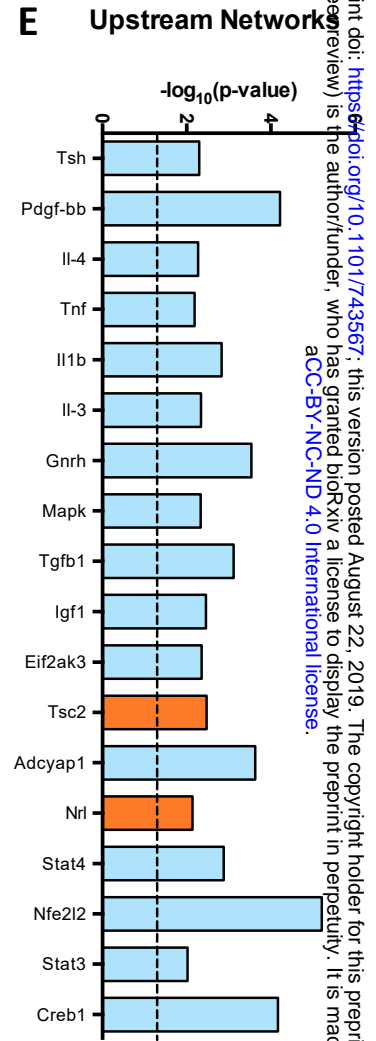

## Supplementary Figure S1

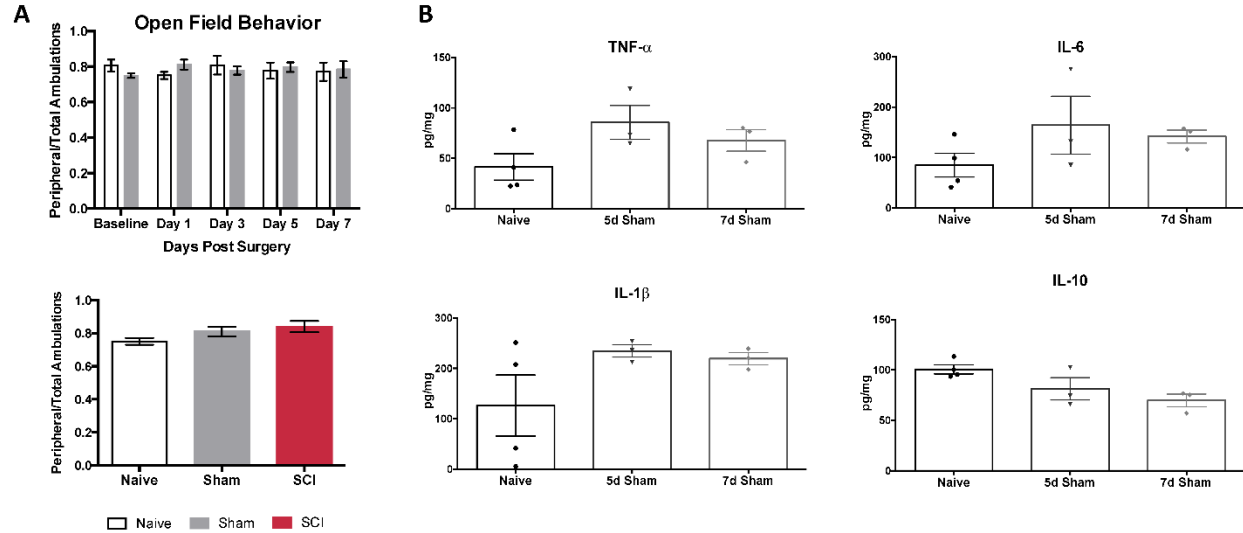

**Supplementary Figure 1. Mobility, cytokine controls.** (A) Open field behavior (10-minute trials) conducted on naïve and sham mice 0,1,3,5 and 7 days post-surgery does not differ significantly at any time point in time spent in periphery, N=6 each. Testing done 1 day post-SCI also does not differ significantly in time spent in periphery, N=6 naïve, N=6 sham, N=4 SCI. (B) Cytokine ELISAs on spinal cord segments at the level of laminectomy (T8-T11) show no significant differences between naïve and sham mice 5 or 7 days post-surgery.

## Supplementary Figure S2

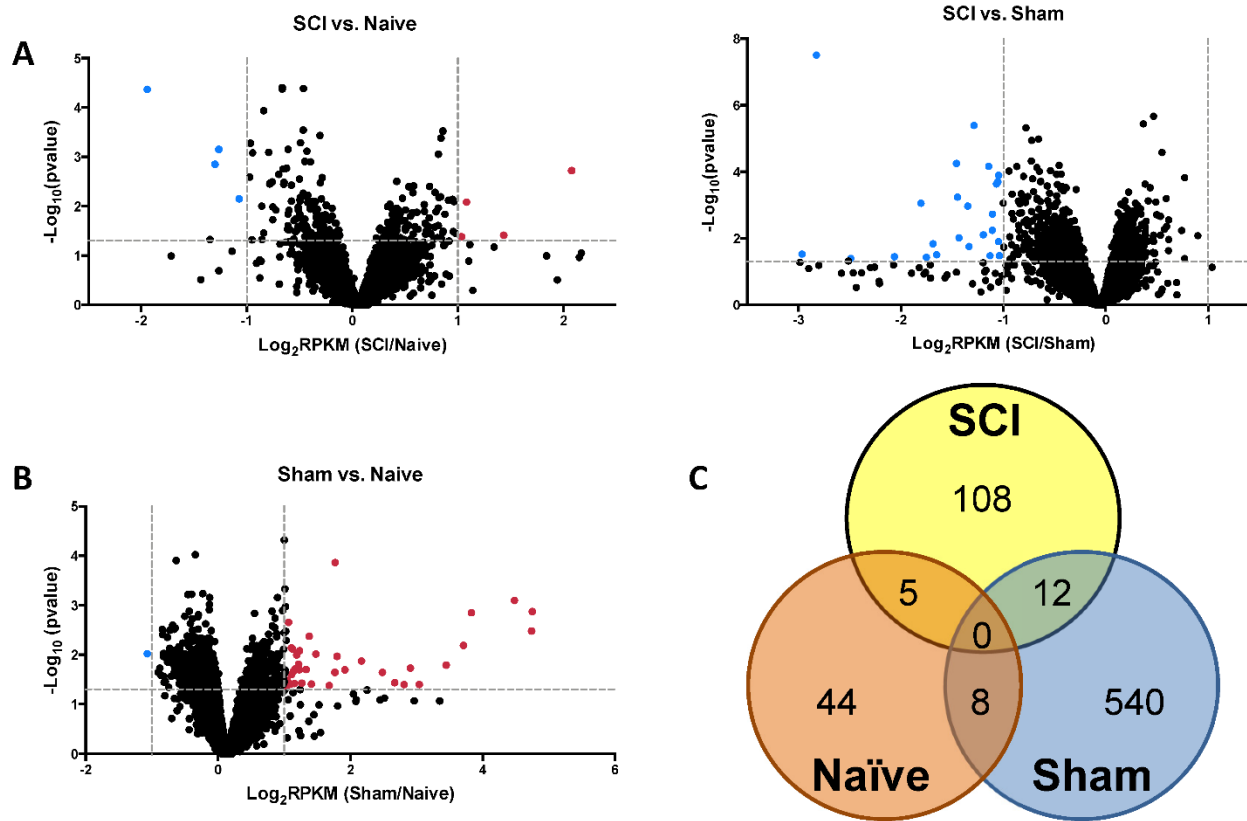

**Supplementary Figure 2. Volcano plots, Venn diagram.** (A) Volcano plot of RNAseq transcript p-Values calculated by DESeq2 comparing SCI vs. naïve, SCI vs. sham, or (B) sham vs. naïve conditions, RPKM >10. (C) Venn diagram of statistically significant genes from the RNAseq data set determined by an overlap of DESeq2 significant genes ( $p < 0.05$ ) and outlier removal, with a cutoff excluding RPKM values <10.

### Supplementary Figure S3

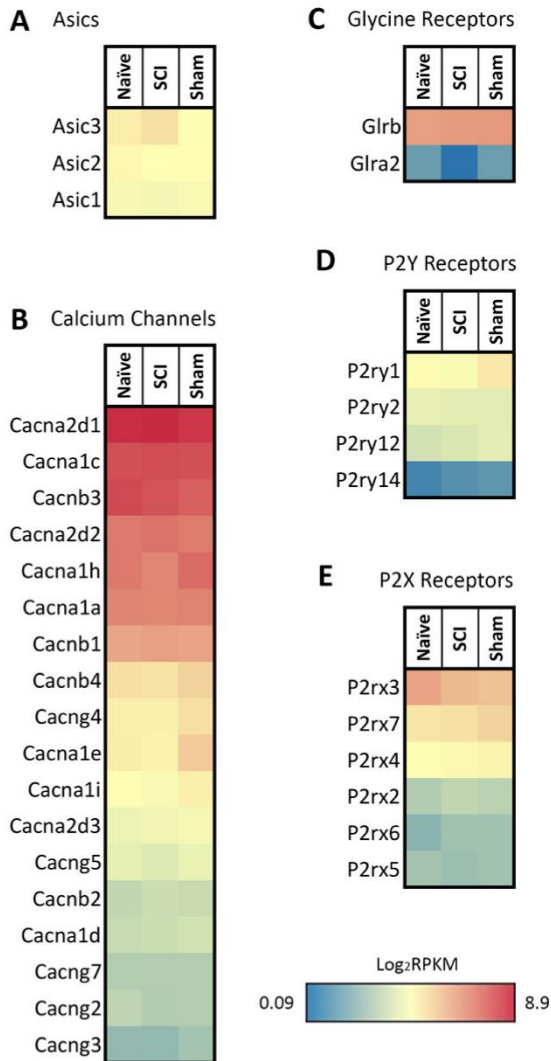

**Supplementary Figure 3. Ion channel heatmaps.** Acid sensing ion channels (Asics), calcium channels, glycine receptors, and purinergic receptors (P2Y, P2X). Expression patterns are similar across all three conditions. Despite their known relevance in pain transduction, no significant changes were observed at the 4 day time point tested. RPKM <1 were not included.

## Supplementary Figure S4

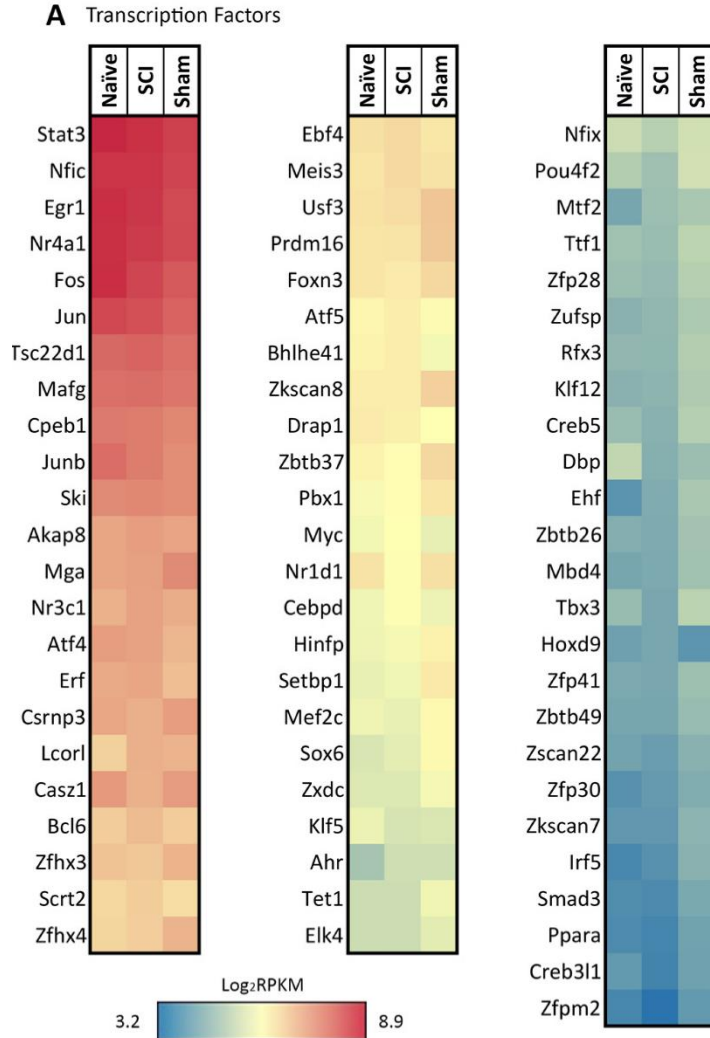

**Supplementary Figure 4. Transcription factor heatmap.** Significant changes between SCI vs. naïve or SCI vs. sham conditions by DESeq2: Ahr, Atf4, Cpeb1, Creb311, Csrnp3, Drap1, Egr1, Erf, Foxn3, Irf5, Jun, Junb, Mafg, Mef2c, Meis3, Myc, Nr3c1, Nr4a1, Pbx1, Tbx3, Tet1, Zfhx3, Zfp28, Zfp30, Zfp41, Zkscan8, Zscan22. RPKM <1 were not included.

## Supplementary Table S5

| Gene    | RPKM Naïve | RPKM SCI | RPKM Sham | p-Value<br>SCI vs. N | p-Value<br>SCI vs. Sham |
|---------|------------|----------|-----------|----------------------|-------------------------|
| Ahr     | 28         | 39       | 39        | 2.0E-02              | -                       |
| Atf4    | 154        | 147      | 121       | -                    | 1.3E-02                 |
| Cpeb1   | 214        | 208      | 188       | -                    | 1.6E-02                 |
| Creb3l1 | 15         | 11       | 17        | 9.7E-02              | 1.4E-02                 |
| Csrnp3  | 139        | 128      | 155       | -                    | 8.4E-03                 |
| Drap1   | 73         | 71       | 61        | -                    | 4.0E-03                 |
| Egr1    | 448        | 404      | 336       | -                    | 3.7E-03                 |
| Erf     | 137        | 141      | 111       | -                    | 1.3E-03                 |
| Foxn3   | 77         | 73       | 88        | -                    | 3.0E-02                 |
| Irf5    | 12         | 14       | 21        | -                    | 2.0E-02                 |
| Jun     | 345        | 323      | 264       | -                    | 7.2E-03                 |
| Junb    | 240        | 207      | 178       | -                    | 2.5E-02                 |
| Mafg    | 238        | 242      | 224       | -                    | 4.6E-03                 |
| Mef2c   | 52         | 49       | 64        | -                    | 1.3E-02                 |
| Meis3   | 77         | 87       | 79        | -                    | 1.3E-02                 |
| Myc     | 54         | 60       | 49        | -                    | 1.1E-03                 |
| Nr3c1   | 128        | 147      | 132       | -                    | 2.0E-02                 |
| Nr4a1   | 435        | 388      | 343       | -                    | 4.9E-03                 |
| Pbx1    | 56         | 61       | 77        | -                    | 5.6E-03                 |
| Tbx3    | 25         | 19       | 33        | 1.1E-02              | 1.7E-03                 |
| Tet1    | 39         | 39       | 53        | -                    | 3.0E-03                 |
| Zfhx3   | 107        | 103      | 124       | -                    | 9.7E-03                 |
| Zfp28   | 25         | 24       | 32        | -                    | 7.3E-03                 |
| Zfp30   | 14         | 16       | 20        | -                    | 4.0E-02                 |
| Zfp41   | 19         | 18       | 26        | -                    | 5.5E-03                 |
| Zkscan8 | 71         | 72       | 95        | -                    | 2.9E-04                 |
| Zscan22 | 17         | 16       | 21        | -                    | 2.7E-02                 |

?

**Supplementary Figure 5. Transcription factors.** Transcript levels that significantly differ 4 days post-SCI. DESeq2 p-Value based on SCI vs Naïve or SCI vs Sham comparisons. P-Values that are not listed were >0.05.

## Supplementary Table S6

| Genes <sup>?</sup>   | Forward <sup>?</sup>                      | Reverse <sup>?</sup>                       |
|----------------------|-------------------------------------------|--------------------------------------------|
| Adcy2 <sup>?</sup>   | AGTCCTCACAGCCTAGGACC <sup>?</sup>         | GGCACTAGACACCAAAGTACG <sup>?</sup>         |
| Ap2a2 <sup>?</sup>   | GCGTGGGGTGGTAAGGTAAT <sup>?</sup>         | TCTCTTTCCACCCAGCCAC <sup>?</sup>           |
| Bdnf <sup>?</sup>    | GGCTGACACTTTTGAGCACGTC <sup>?</sup>       | CTCCAAAGGCACCTGACTGCTG <sup>?</sup>        |
| Cadm1 <sup>?</sup>   | GATCCCCACAGGTGATGGAC <sup>?</sup>         | GGAGCTGGATCACTGAGTCG <sup>?</sup>          |
| Camk2g <sup>?</sup>  | GCACAGGAGCTGGAAAAGA <sup>?</sup>          | GGTCTGAGGCATGCACAAGT <sup>?</sup>          |
| Ephb2 <sup>?</sup>   | CCGAGTACCAGACCAGCATC <sup>?</sup>         | GCTCAAACCCCGTCTGTTA <sup>?</sup>           |
| Gabrg3 <sup>?</sup>  | TATCATGCAACGACCCCTGT <sup>?</sup>         | TAGATCCTGTGTGTACGGGCA <sup>?</sup>         |
| Gria4 <sup>?</sup>   | CGCCCAAGGGTTCCTCATTA <sup>?</sup>         | CGCTGCCACATTCTCCTTTG <sup>?</sup>          |
| Hprt* <sup>?</sup>   | GACTGAAAGACTTGCTCGAGATGTCATG <sup>?</sup> | AGTGCTTTAATGTAATCCAGCAGGTCAGC <sup>?</sup> |
| Il6st <sup>?</sup>   | CTTCGCTCGAGCATGTTTTAGA <sup>?</sup>       | AGCCCACGGGCAGAACTA <sup>?</sup>            |
| Kcng3 <sup>?</sup>   | AGGGAACCTCCGGGATAAT <sup>?</sup>          | TGATGTTCAGGGGTCTCTTGAC <sup>?</sup>        |
| Nlgn2 <sup>?</sup>   | ATGGCACAAGGCAGGTGAAG <sup>?</sup>         | AGGTAAGTTCCAGGCAGCG <sup>?</sup>           |
| Ntrk2 <sup>?</sup>   | GCAATCGGGAGCATCTCTCG <sup>?</sup>         | GTTGCTGATGACCGAAGCTG <sup>?</sup>          |
| Piezo2 <sup>?</sup>  | GCACTCTACCTCAGGAAGACTG <sup>?</sup>       | CAAAGCTGTGCCACCAGGTTCT <sup>?</sup>        |
| Prkar2b <sup>?</sup> | CCACATGCCACAAGATATGG <sup>?</sup>         | TGAGCTTGCTGGTTGACGTT <sup>?</sup>          |
| Rasgrp1 <sup>?</sup> | TCTGCAGGAGGGTATACTGGG <sup>?</sup>        | GGTAAAAACCAAGGATGTCAACAGT <sup>?</sup>     |
| Scn10a <sup>?</sup>  | ACAGTGATGGTGCTAGGCAA <sup>?</sup>         | CAAGTTGTTACCTCCCCGT <sup>?</sup>           |
| Scn5a <sup>?</sup>   | CTAGCTCGAGGCTTCTGCC <sup>?</sup>          | GCCGACAAATTGCCTAGCTT <sup>?</sup>          |
| Stxbp2 <sup>?</sup>  | TCATTAACGCTGAGAACCTGGG <sup>?</sup>       | ACCTCTCTATCTCCTTGCCAA <sup>?</sup>         |
| Syt4 <sup>?</sup>    | CTCATCGCCATCCAGTGACA <sup>?</sup>         | TGTACATACATGCAGAGGCCG <sup>?</sup>         |
| Trpc3 <sup>?</sup>   | AAAGCGTCACTGAGTCGTGT <sup>?</sup>         | GAGGCCGAAAGGTTCTCAT <sup>?</sup>           |
| <sup>?</sup>         |                                           |                                            |

**Supplementary Figure 6. Primer list.** Primers for voltage-gated channels, receptors, Trp channels, or involvement in the synaptogenesis pathway were designed for PCR products 111-143 bp in size, T<sub>m</sub>=59.5-63.5C, validated on whole DRG tissue before preamplification. Hprt was the least variable gene based on RNAseq results.

## Supplementary Figure S7

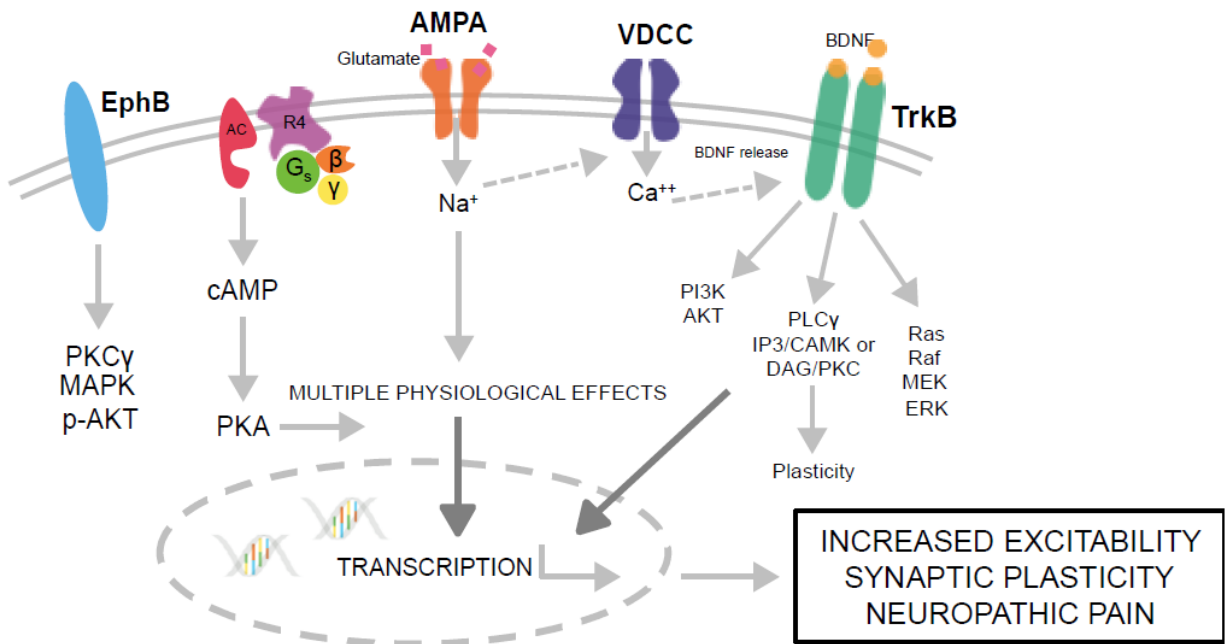

**Supplementary Figure 7.** Proposed model of how this signaling pathway may be contributing to the onset of chronic pain 4 days post-SCI in DRG distal to the site of injury. RNAseq data, IPA analysis, and qPCR validation suggest Ntrk2 (TrkB) signaling may play a role during the transition from acute to chronic pain at 4 days post-SCI.
